# Supplementary material for: Design and synthesis of a dinucleating ligand system with varying terminal donor functions that provides no bridging donor and its application to the synthesis of a series of FeIII–μ-O–FeIII complexes
Source: Royal Society of Chemistry journal article supplement (doi:10.1039/c5dt03711e), 2016-01-01
Supplement: c5dt03711e1.pdf [file c5dt03711e1.pdf]

## Electronic Supplementary Information

### Design and Synthesis of a Dinucleating Ligand System with Varying Terminal Donor Functions that Provides no Bridging Donor and its Application to the Synthesis of a Series of Fe<sup>III</sup>- $\mu$ -O-Fe<sup>III</sup> Complexes

**Julia Bernhardtete Hildegard Strautmann, Susanne Dammers, Thomas Limpke,  
Janine Parthier, Stephan Walleck, Gabriele Heinze-Brückner, Anja Stammler, Hartmut  
Bögge, Thorsten Glaser\***

*Lehrstuhl für Anorganische Chemie I, Fakultät für Chemie, Universität Bielefeld,  
Universitätsstr. 25, D-33615 Bielefeld, Germany.*

*[www.uni-bielefeld.de/chemie/ac1chair/](http://www.uni-bielefeld.de/chemie/ac1chair/)*

*\* Corresponding author. E-Mail address: [thorsten.glaser@uni-bielefeld.de](mailto:thorsten.glaser@uni-bielefeld.de)*

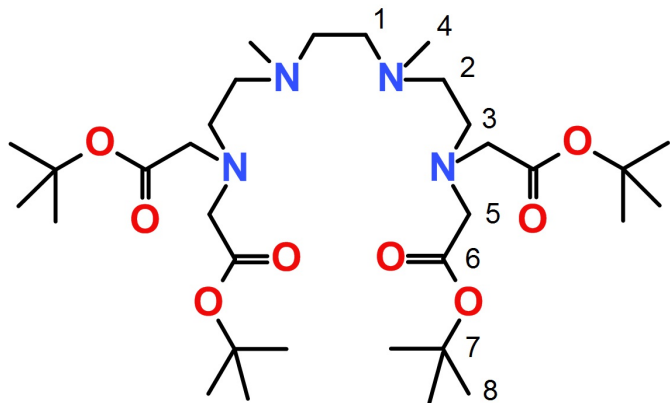

—7.26 Chloroform-d

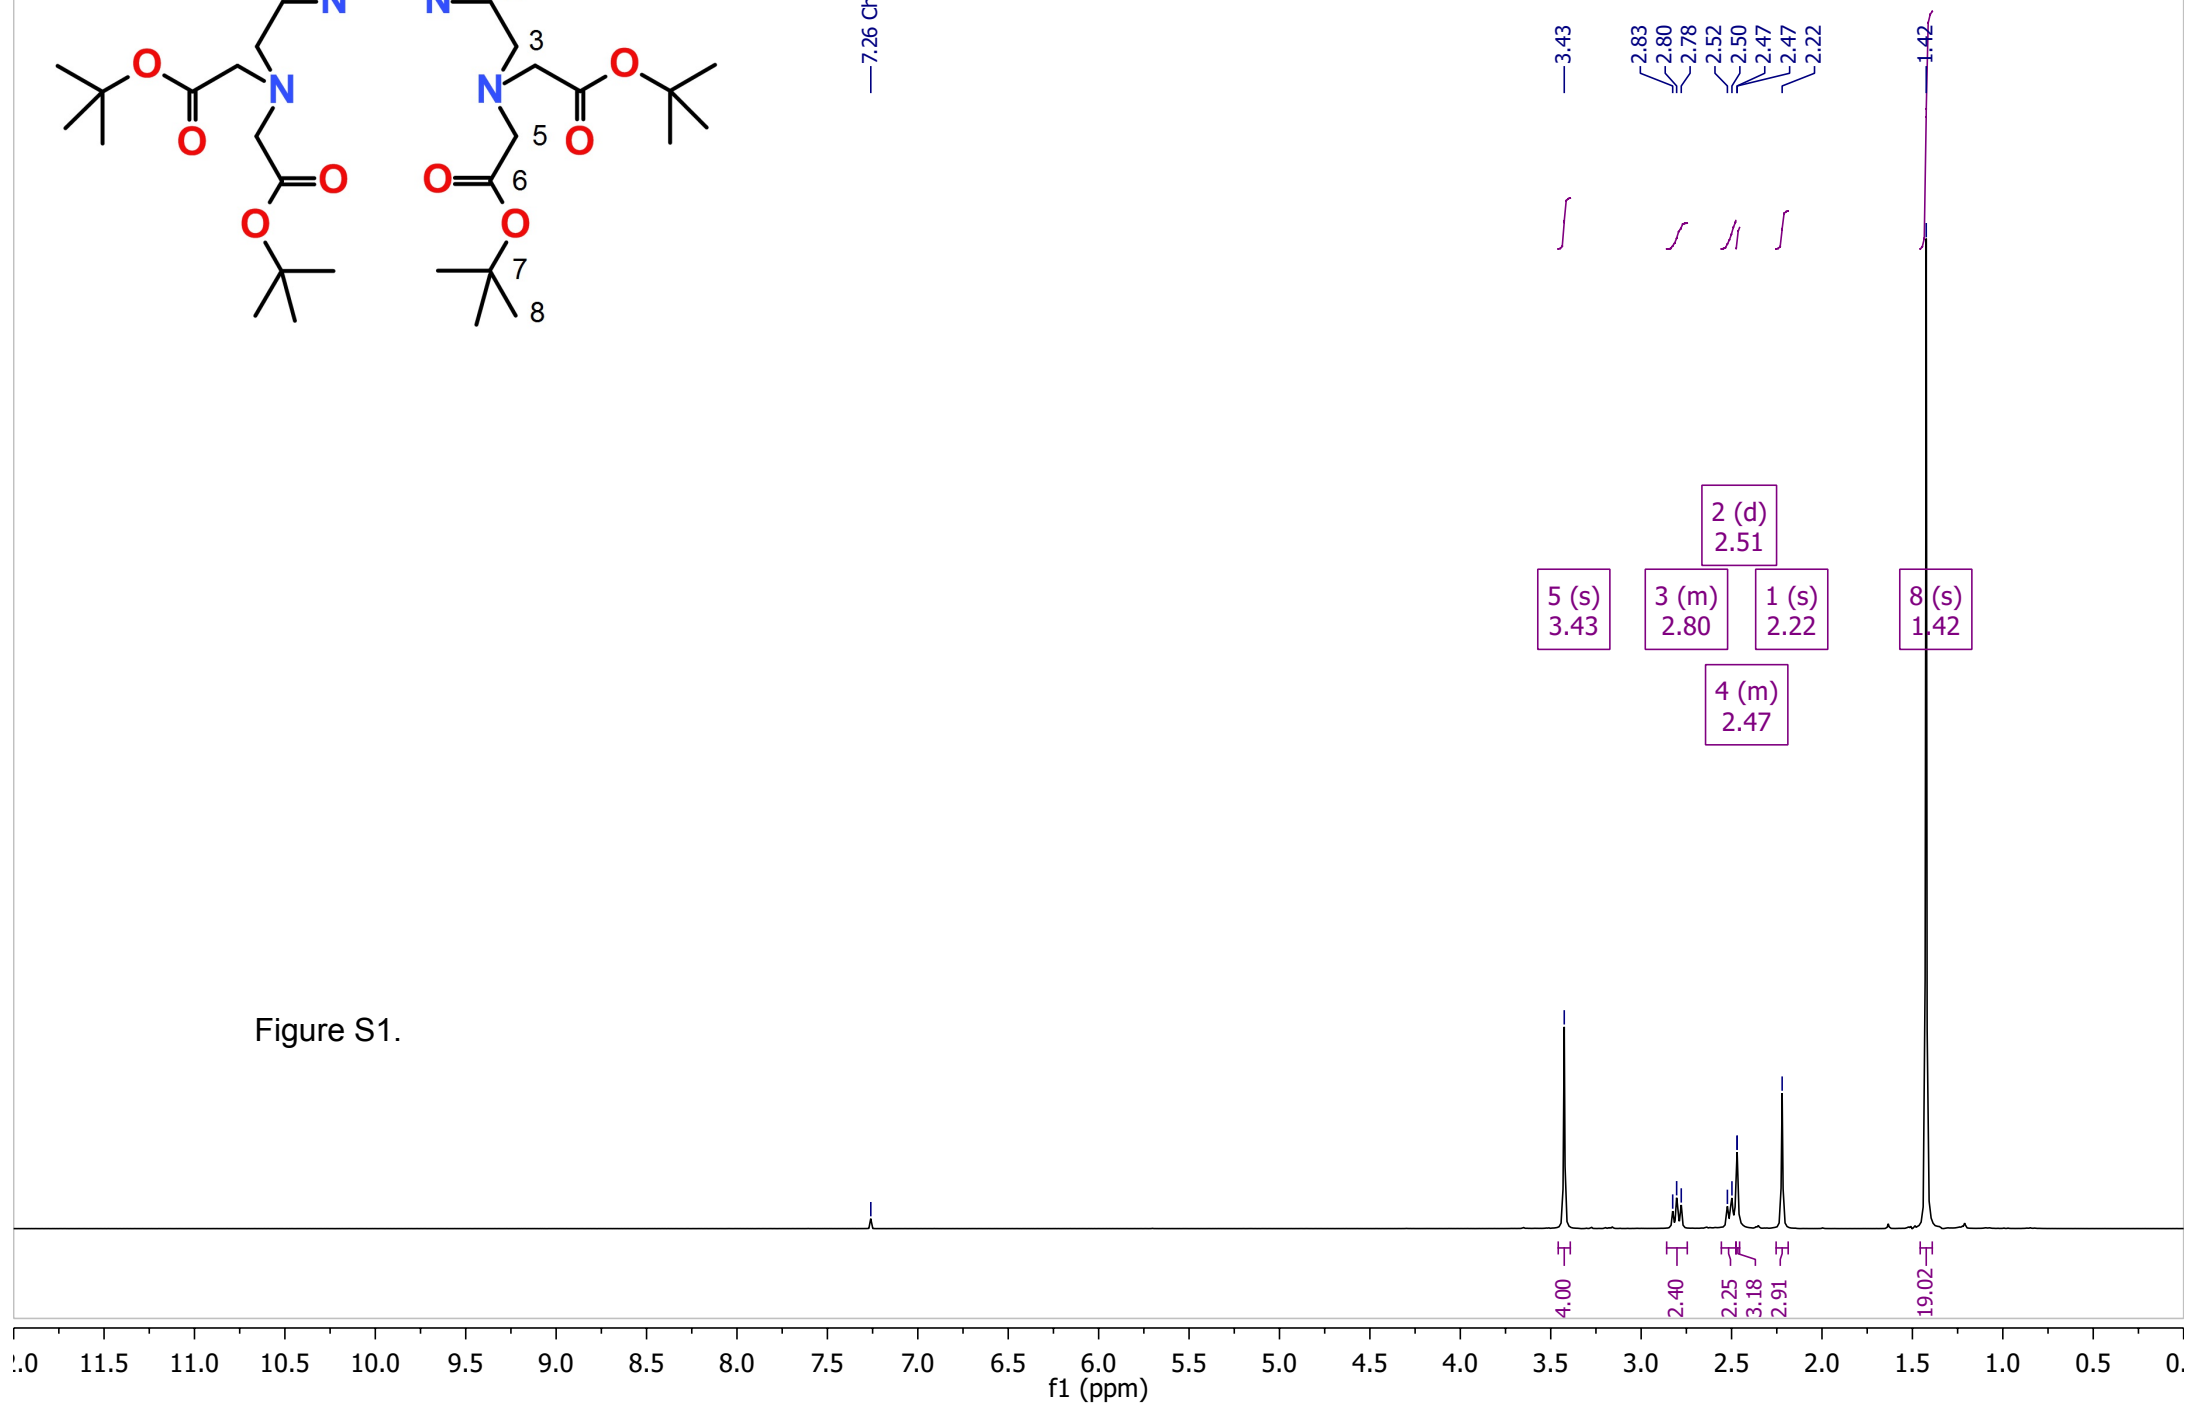

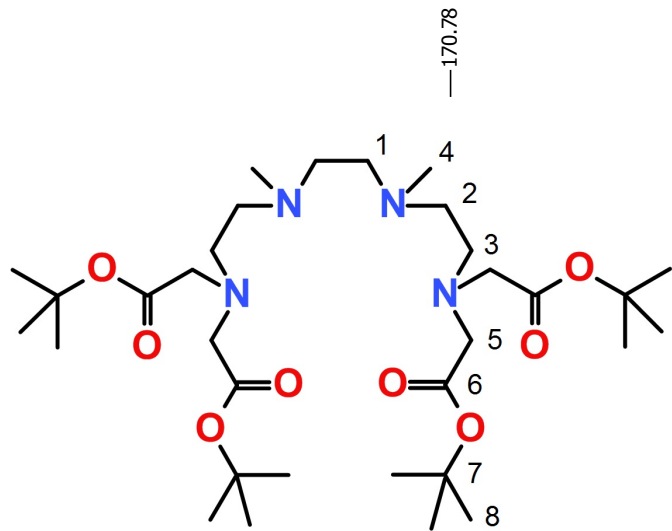

Figure S2.

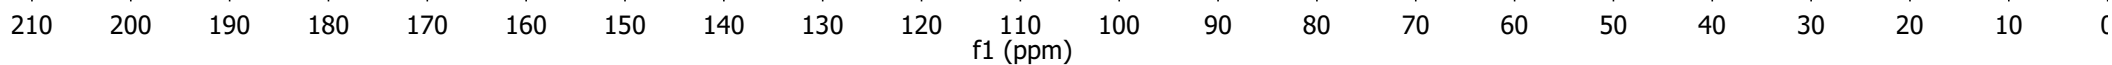

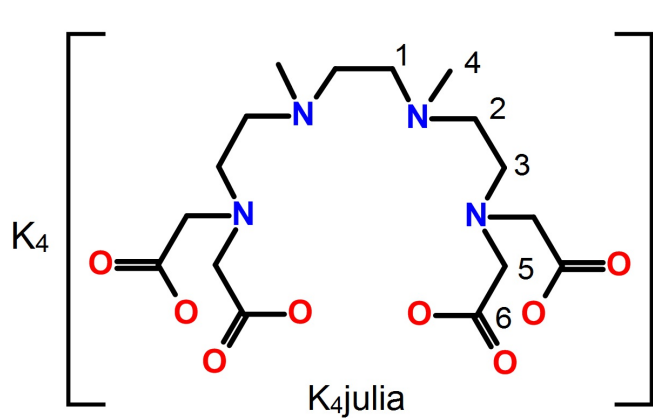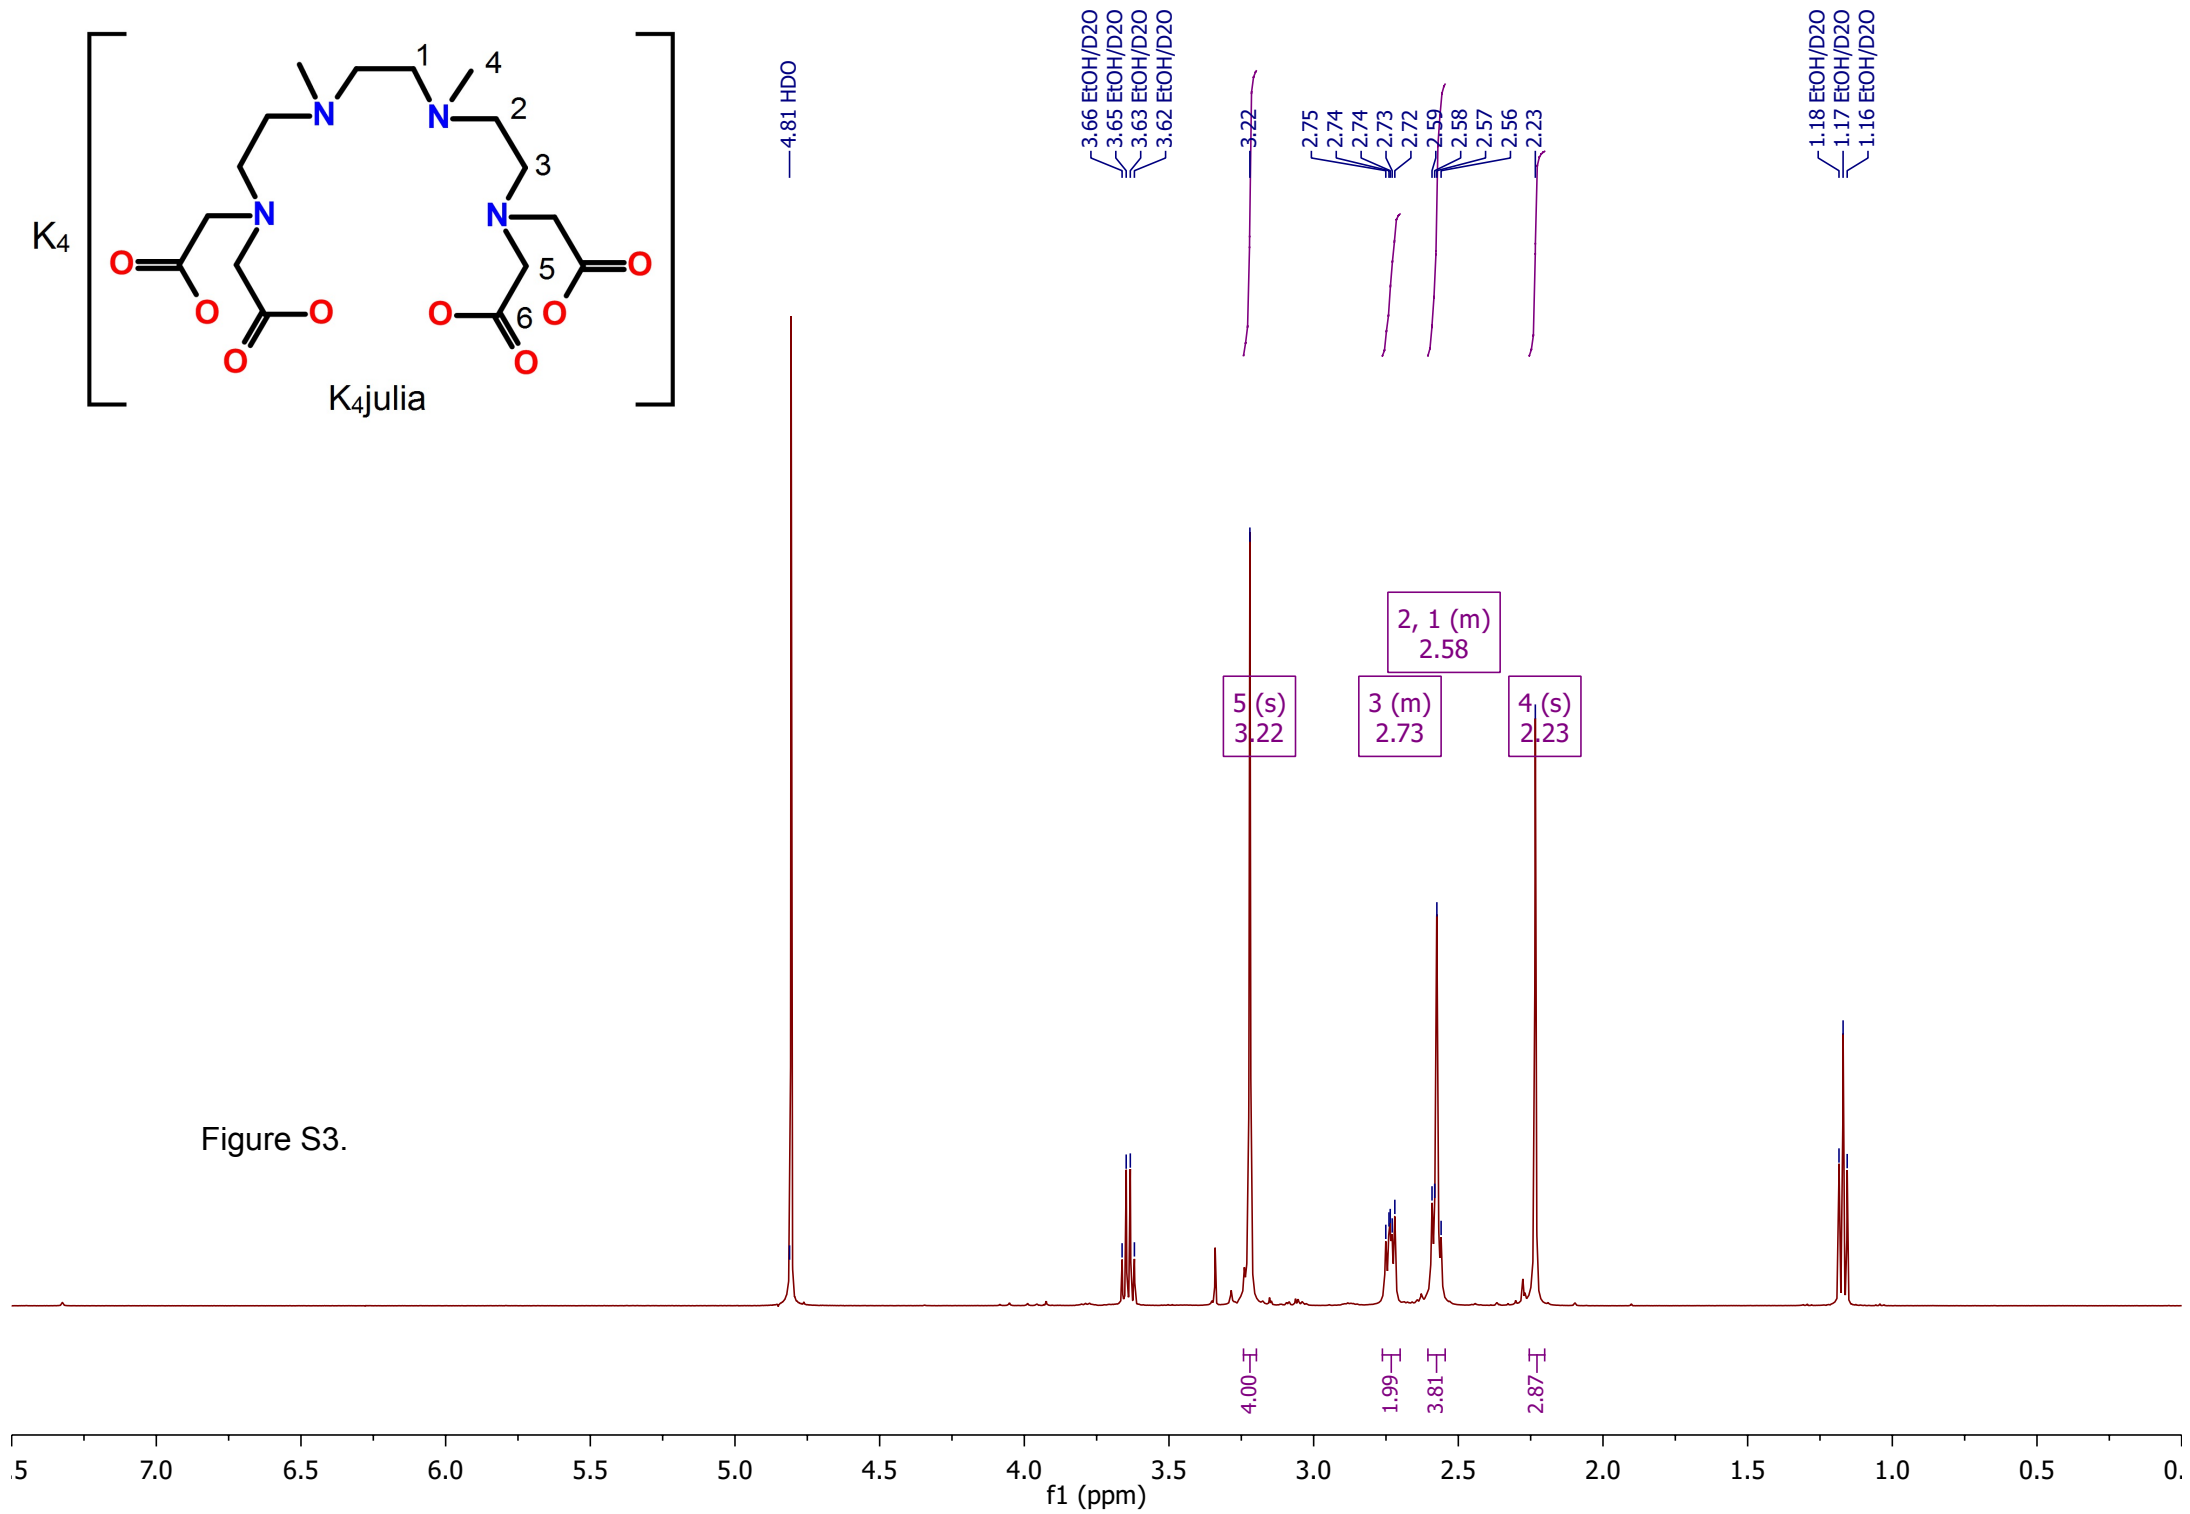

Figure S3.

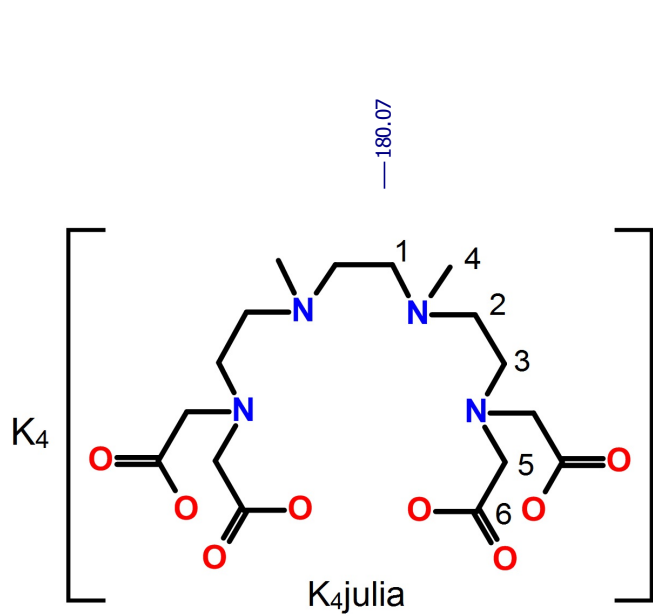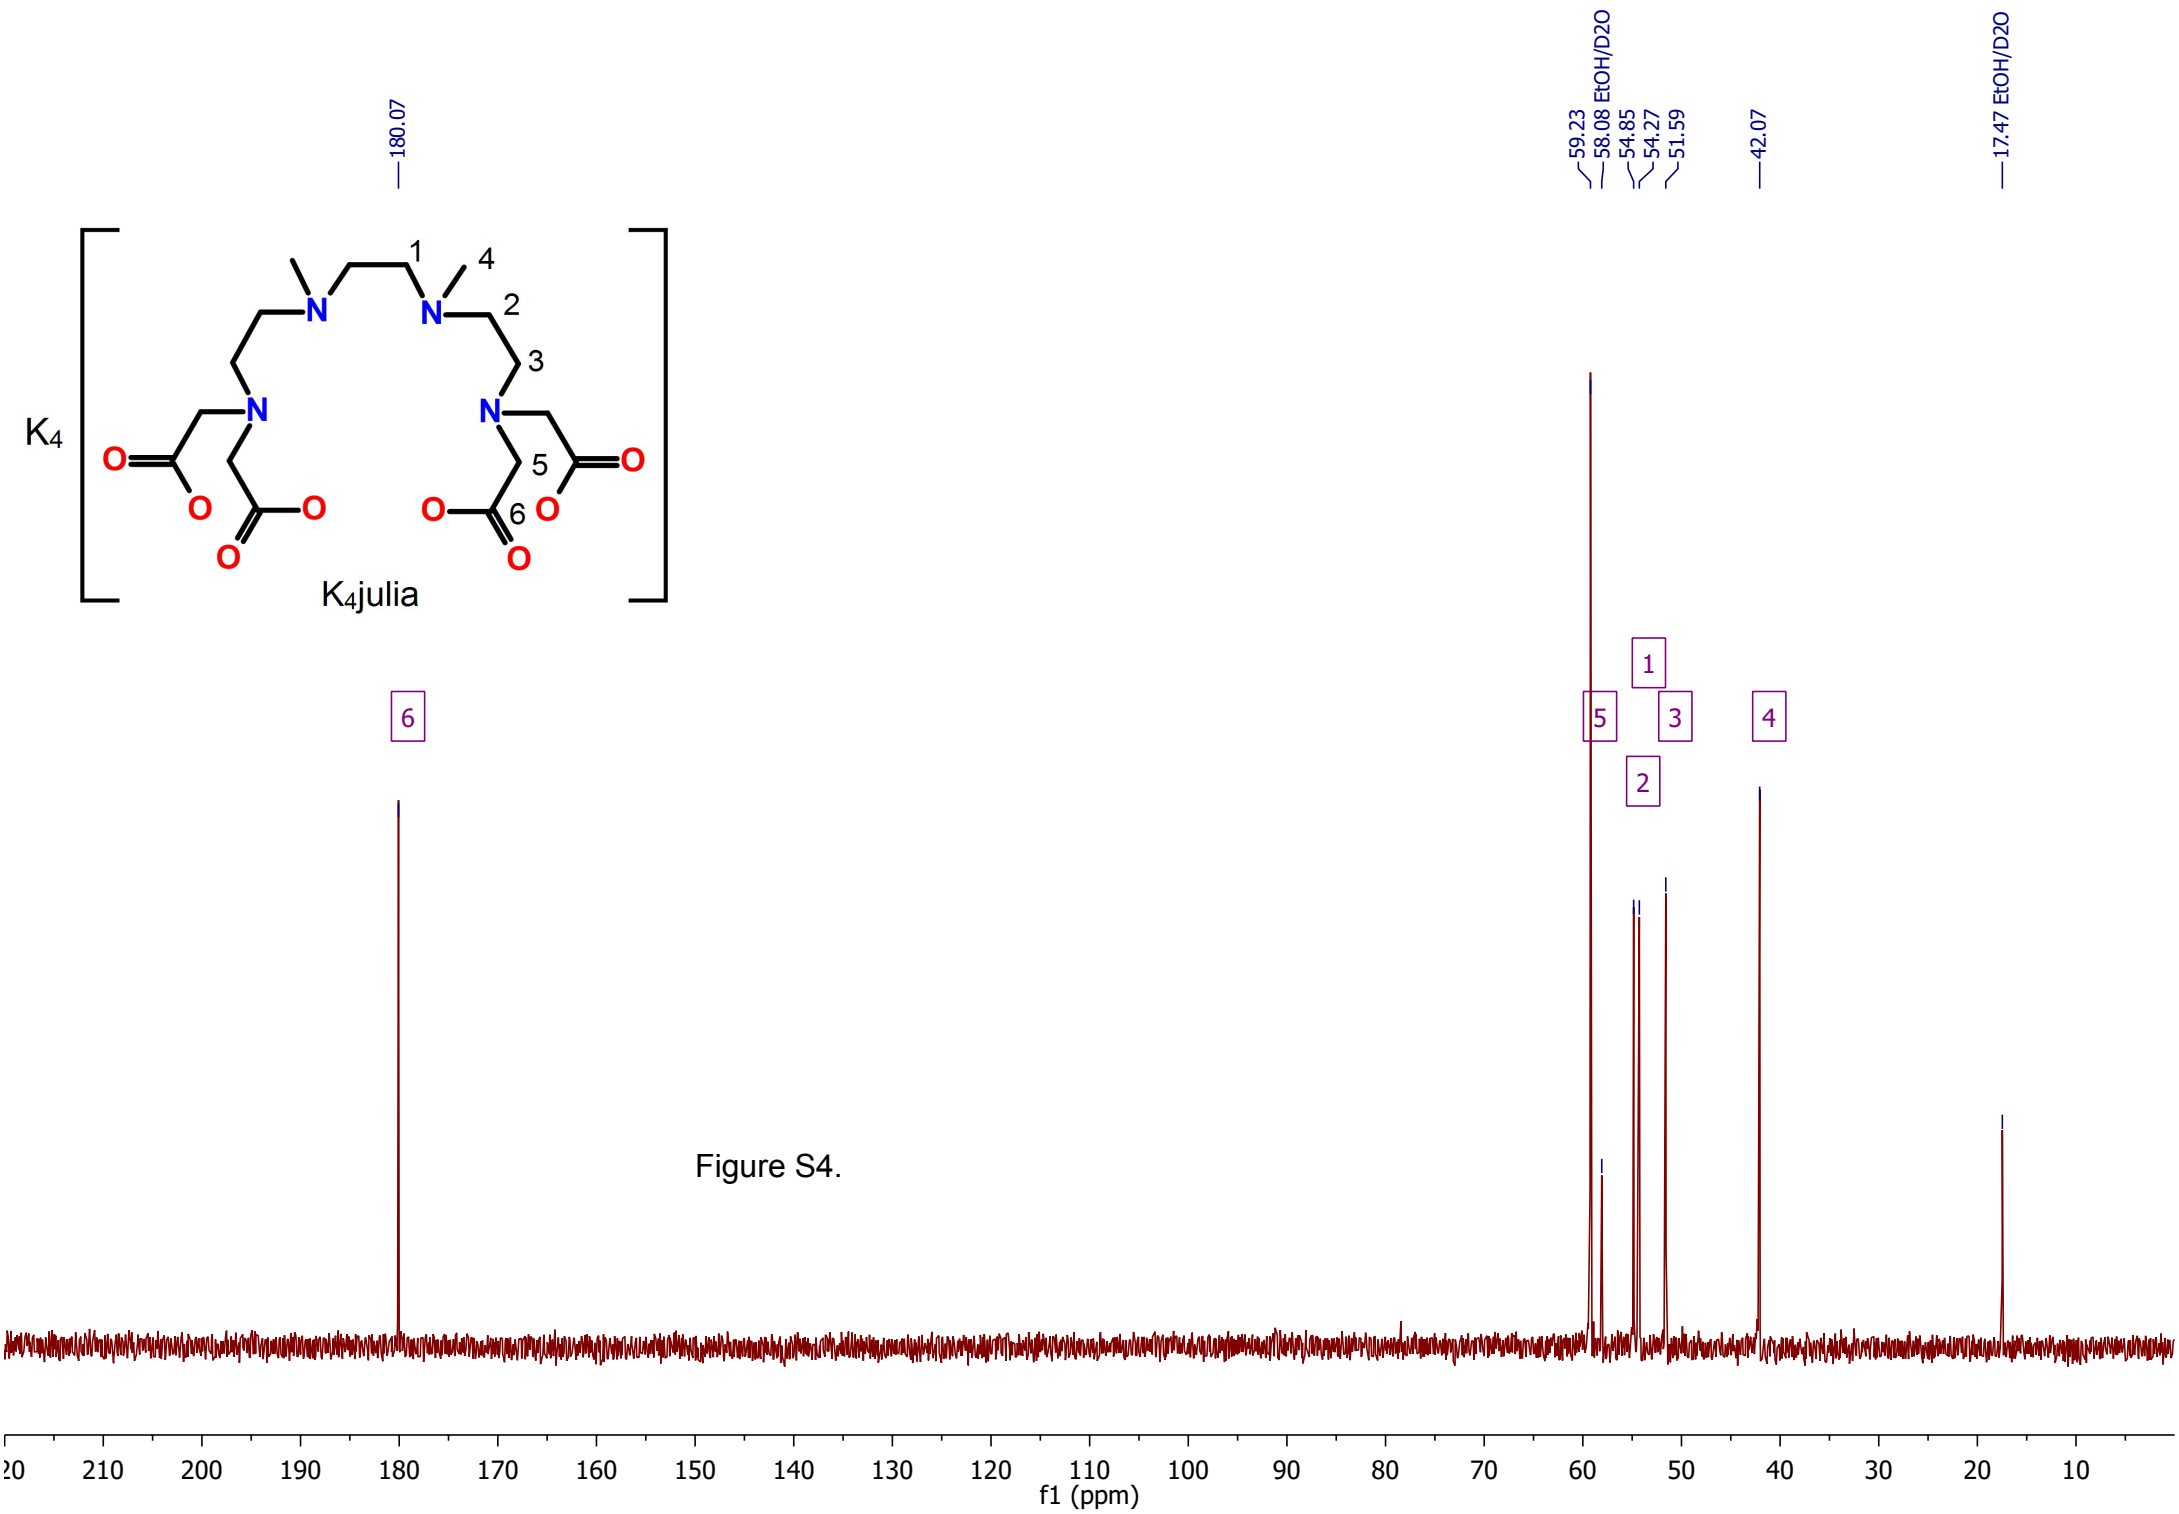

Figure S4.

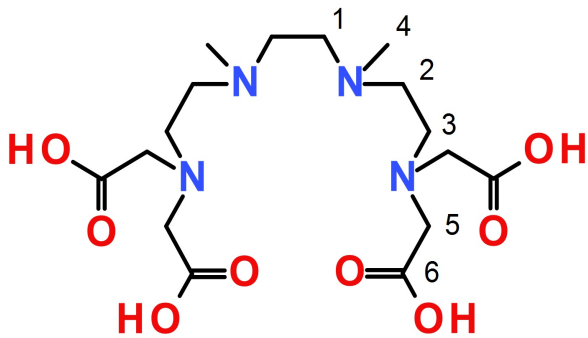

Figure S5.

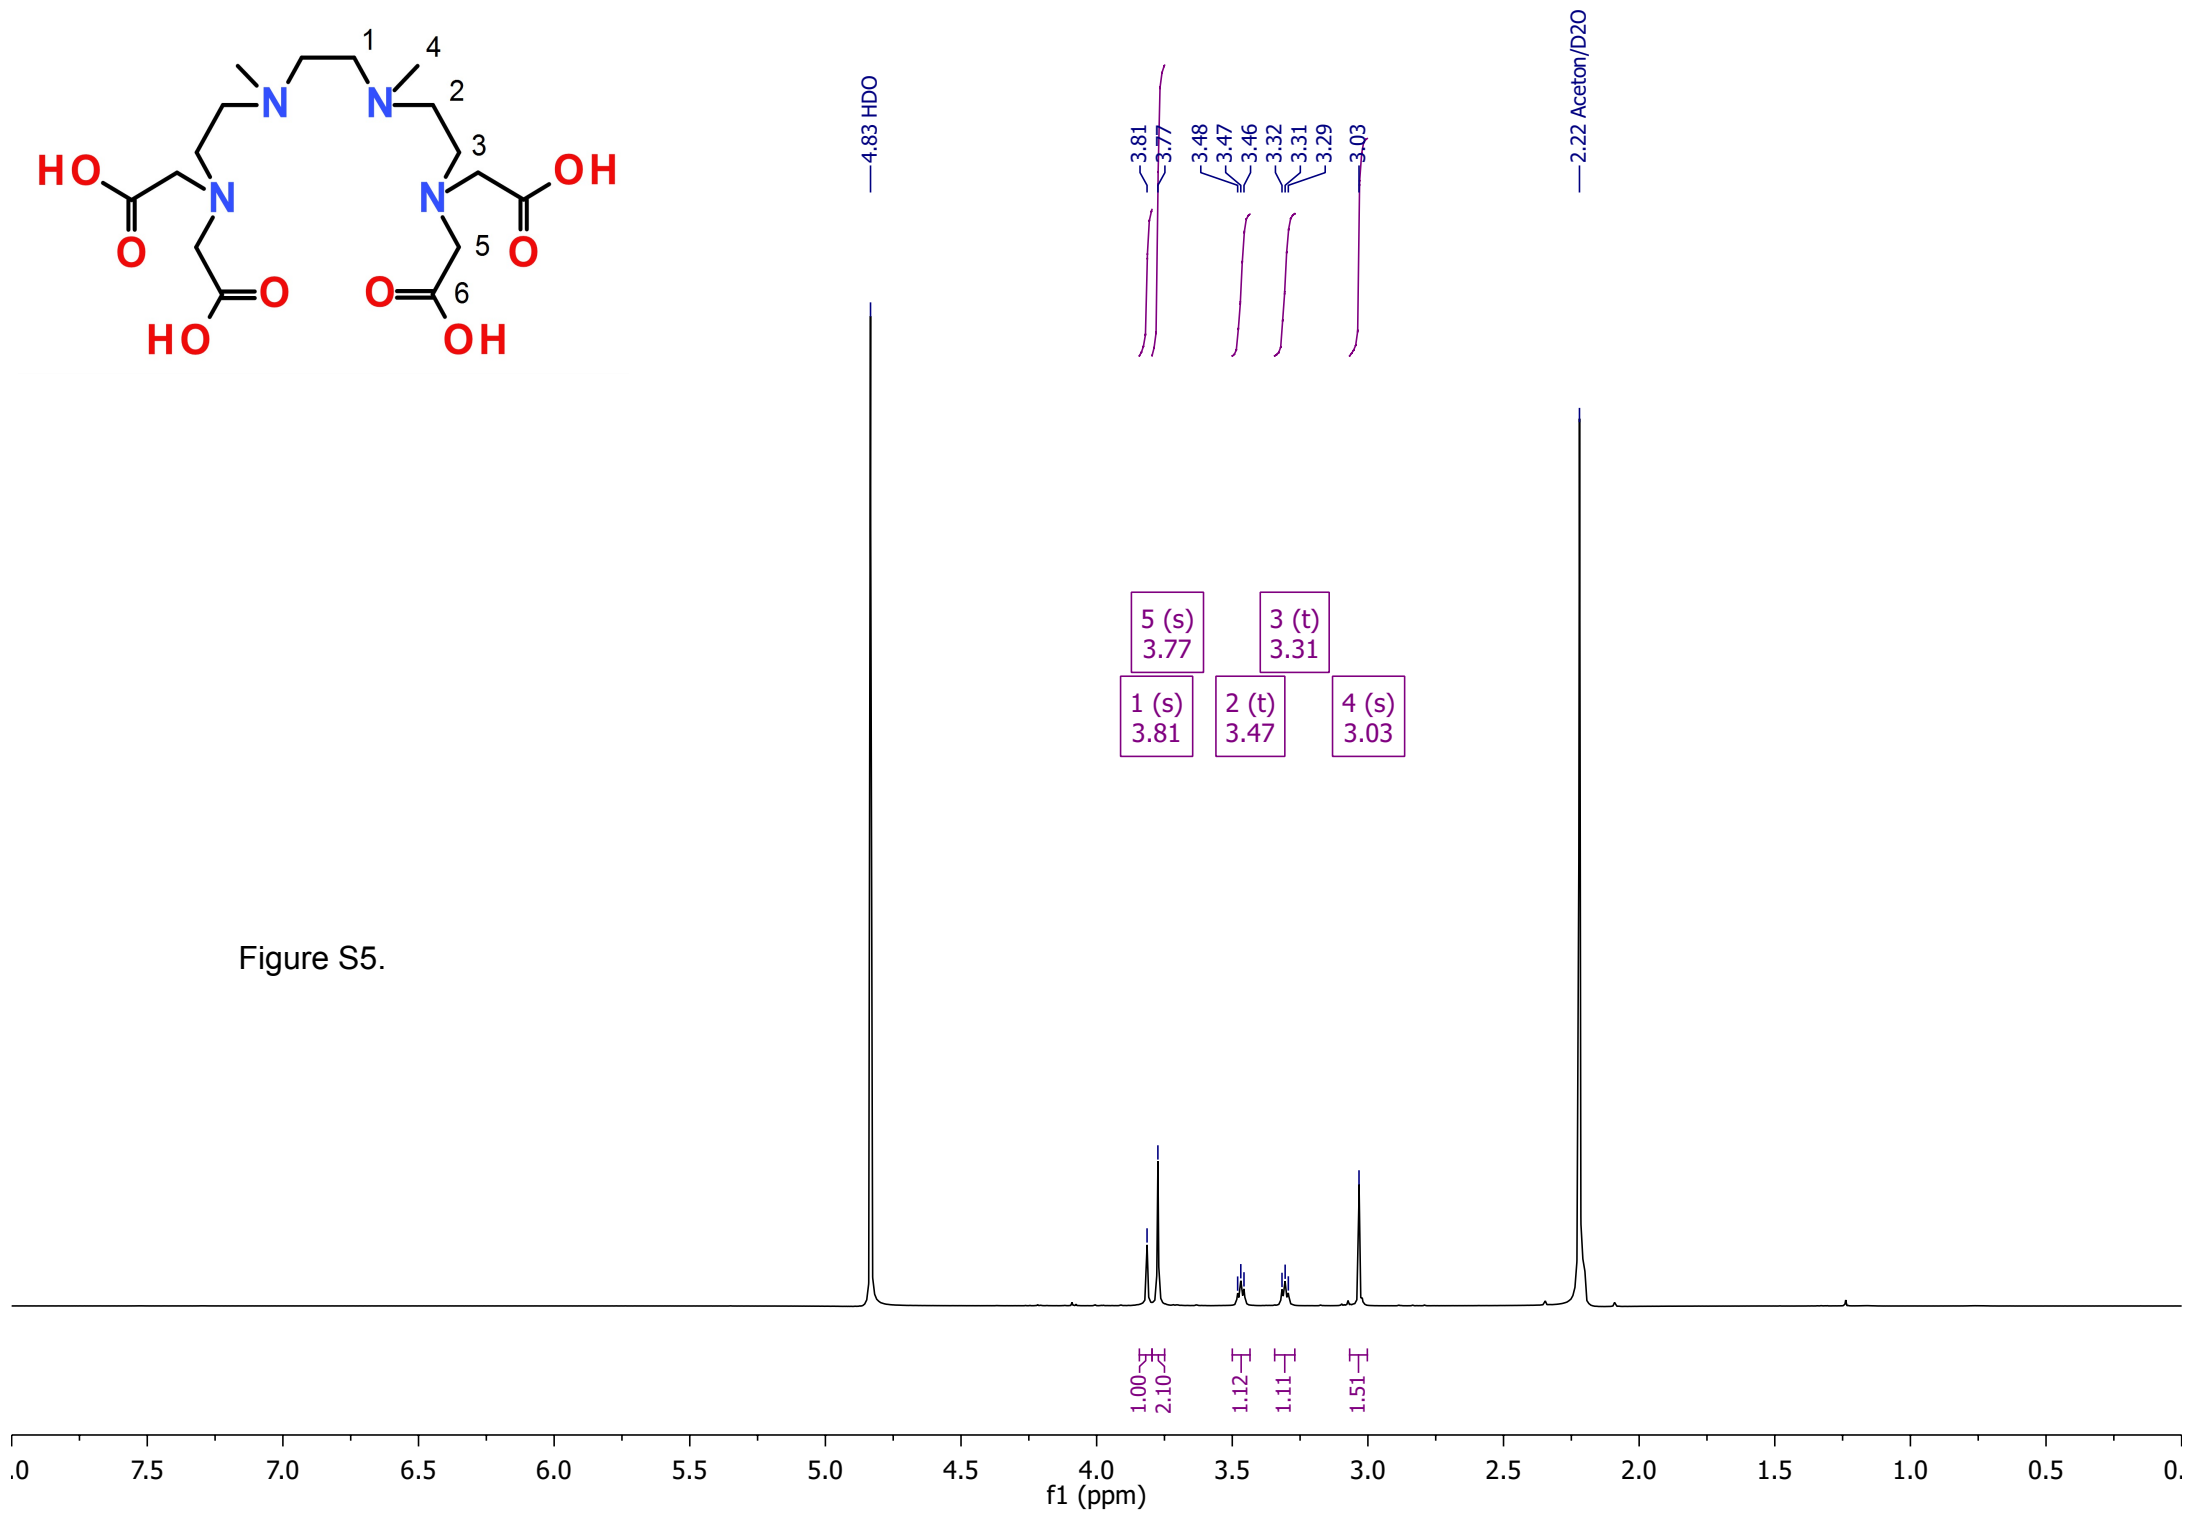

—216.02 Acetone

—175.13

—56.56

—56.14

—51.36

—50.49

—41.36

—30.89 Acetone/D2O

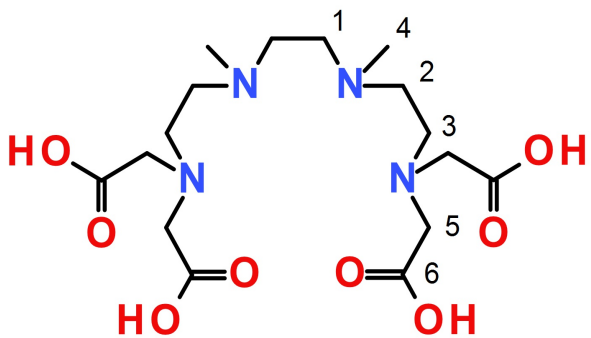

6

2

3

5

1

4

Figure S6.

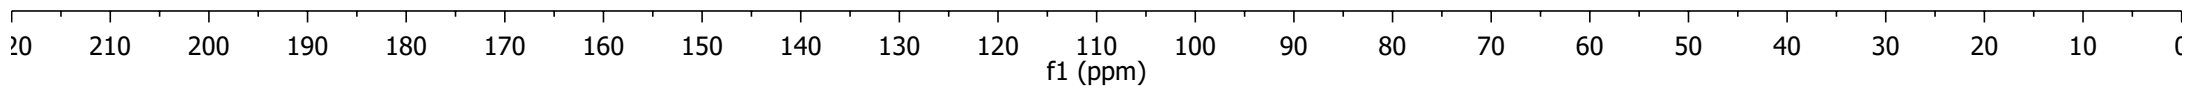

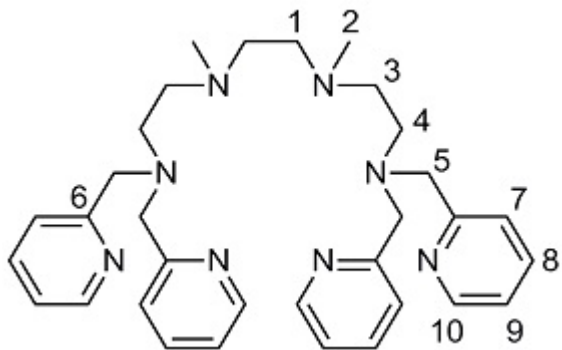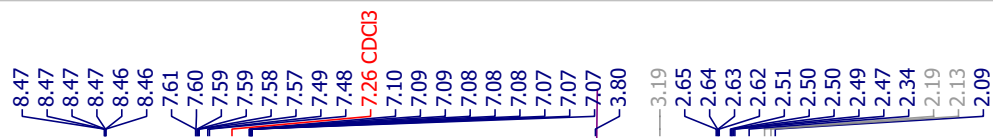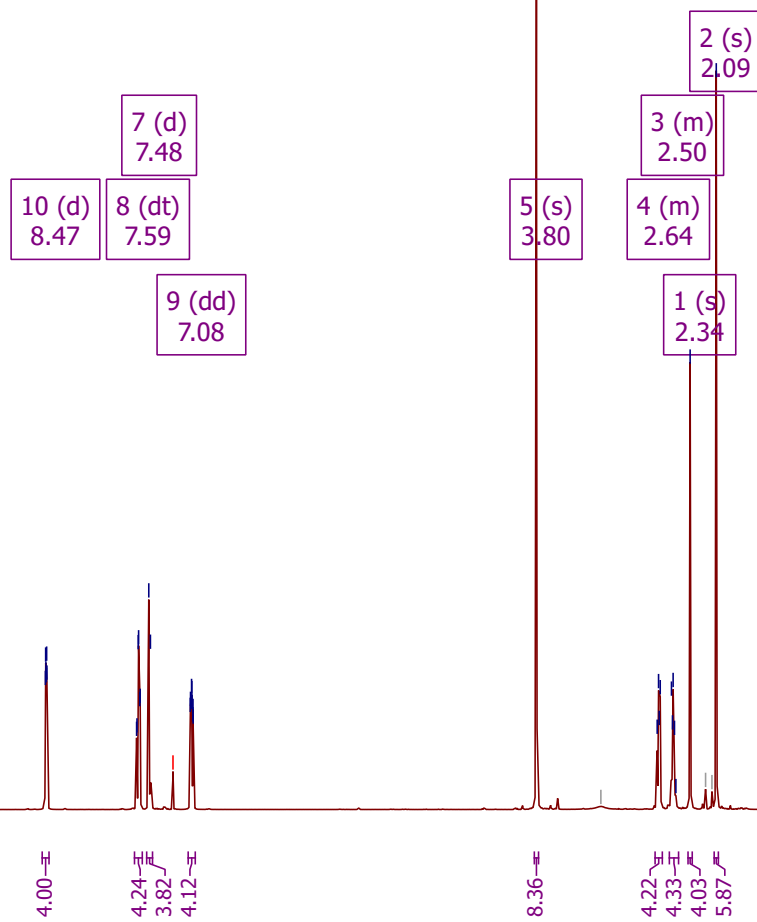

Figure S7.

16 15 14 13 12 11 10 9 8 7 6 5 4 3 2 1 0 -1 -2 -3 -4  
f1 (ppm)



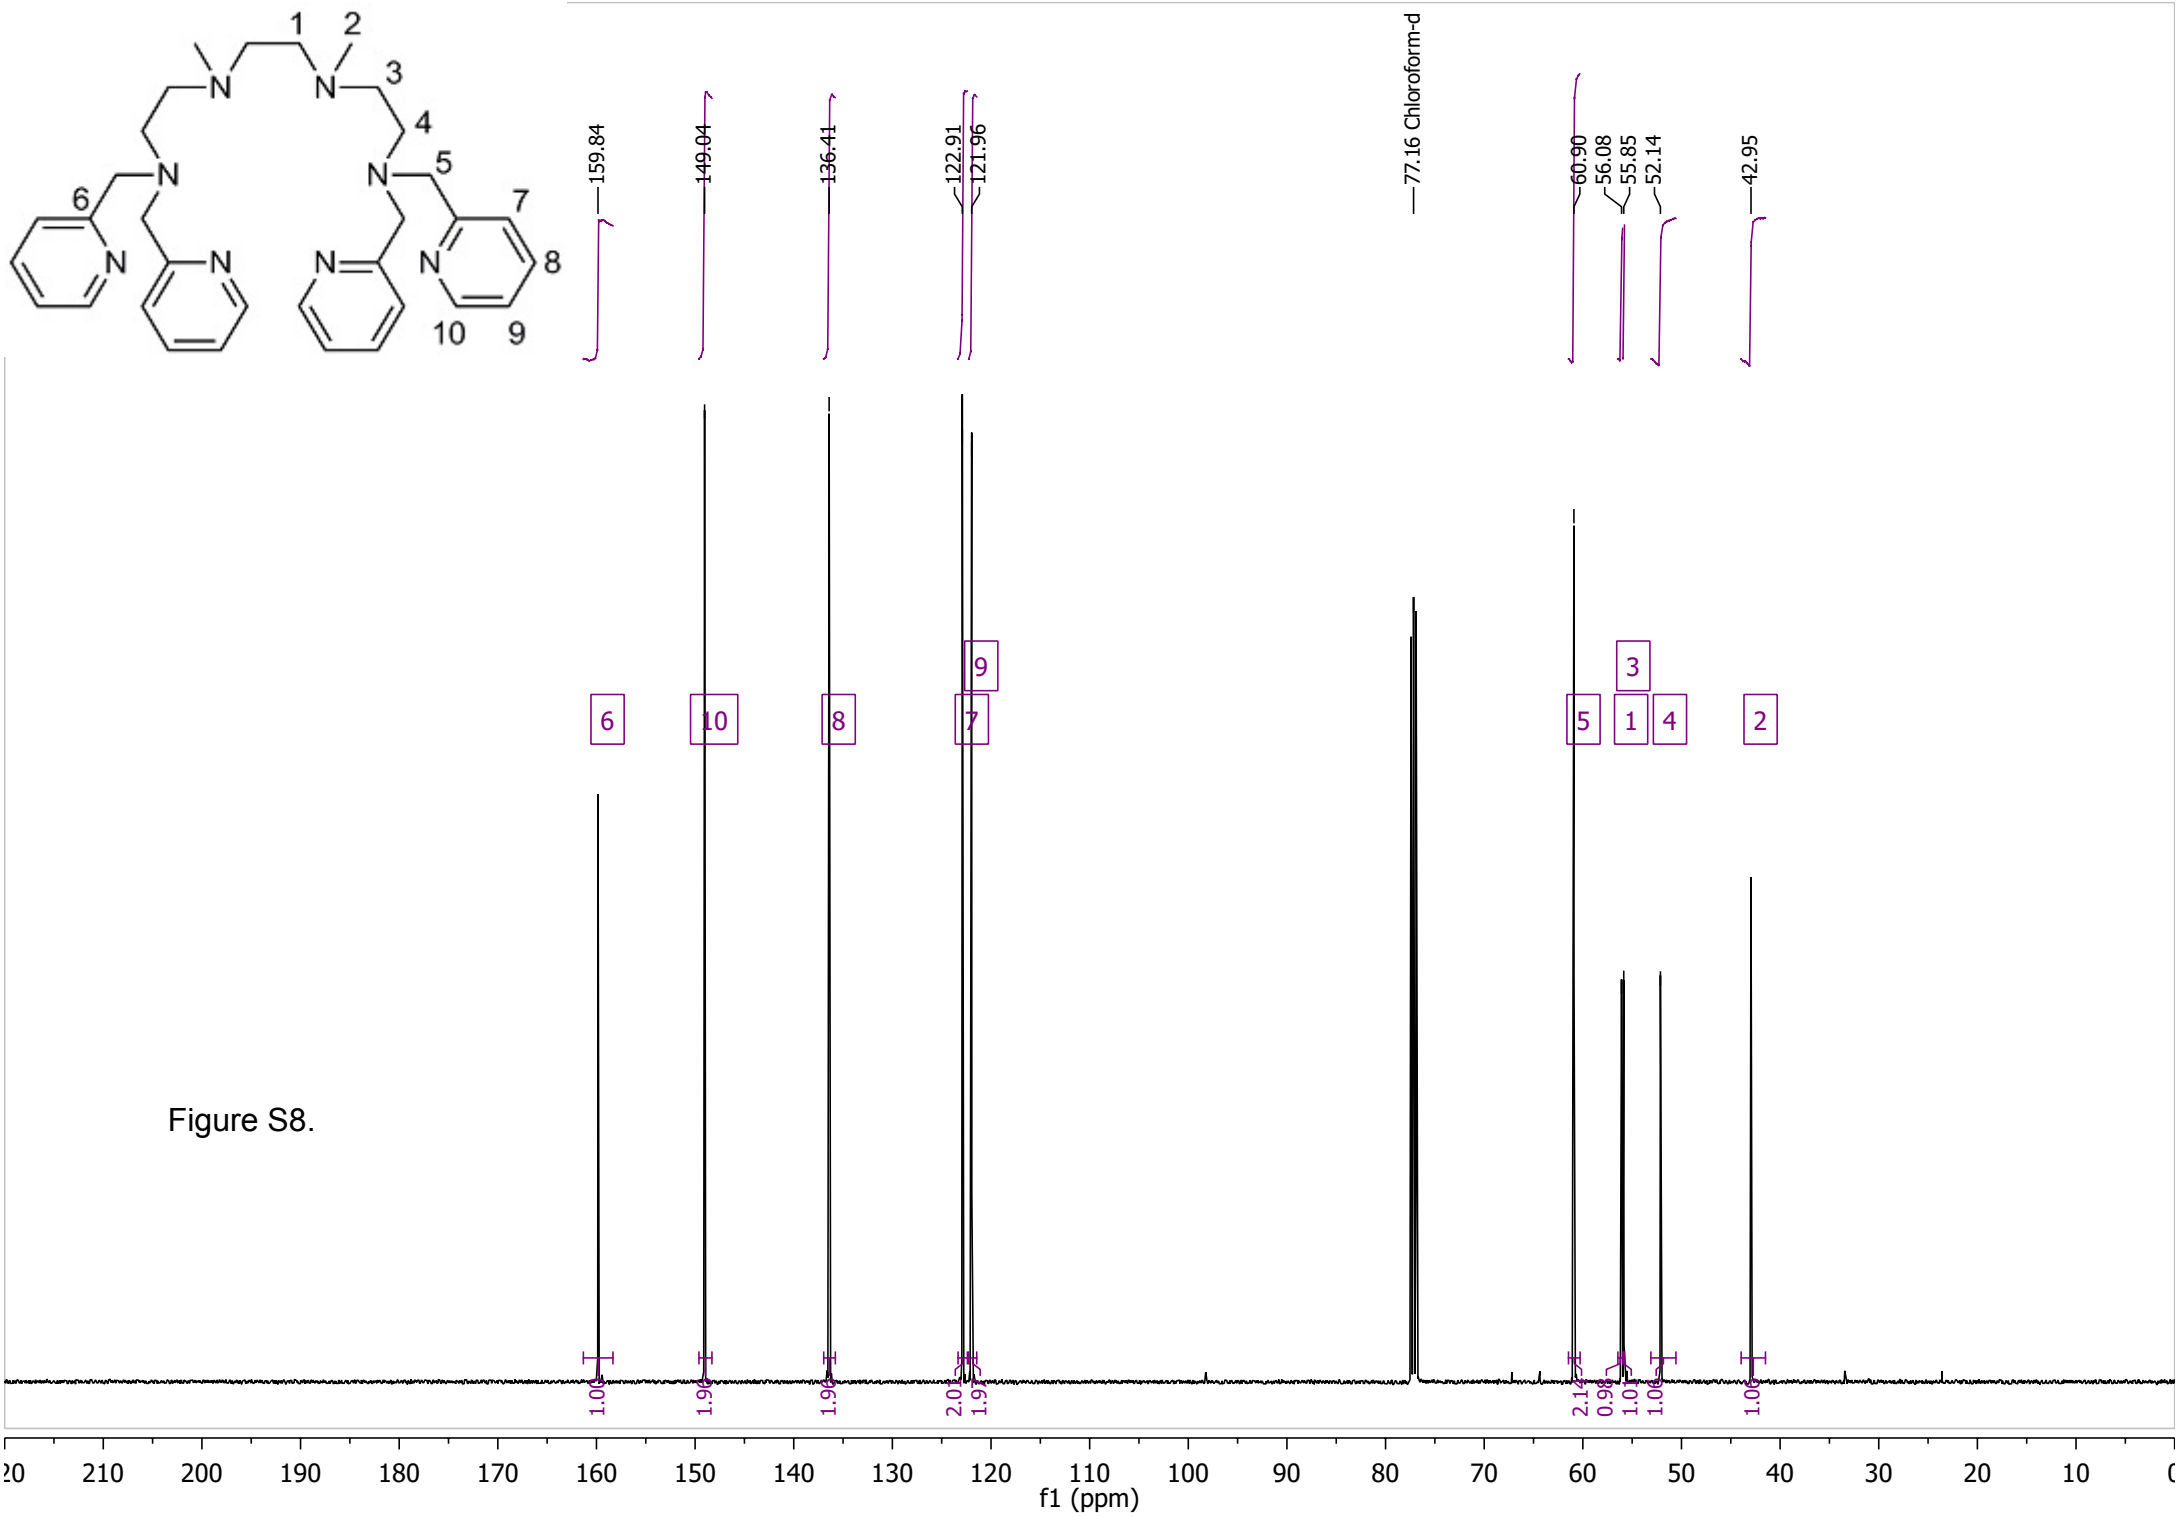

Figure S8.

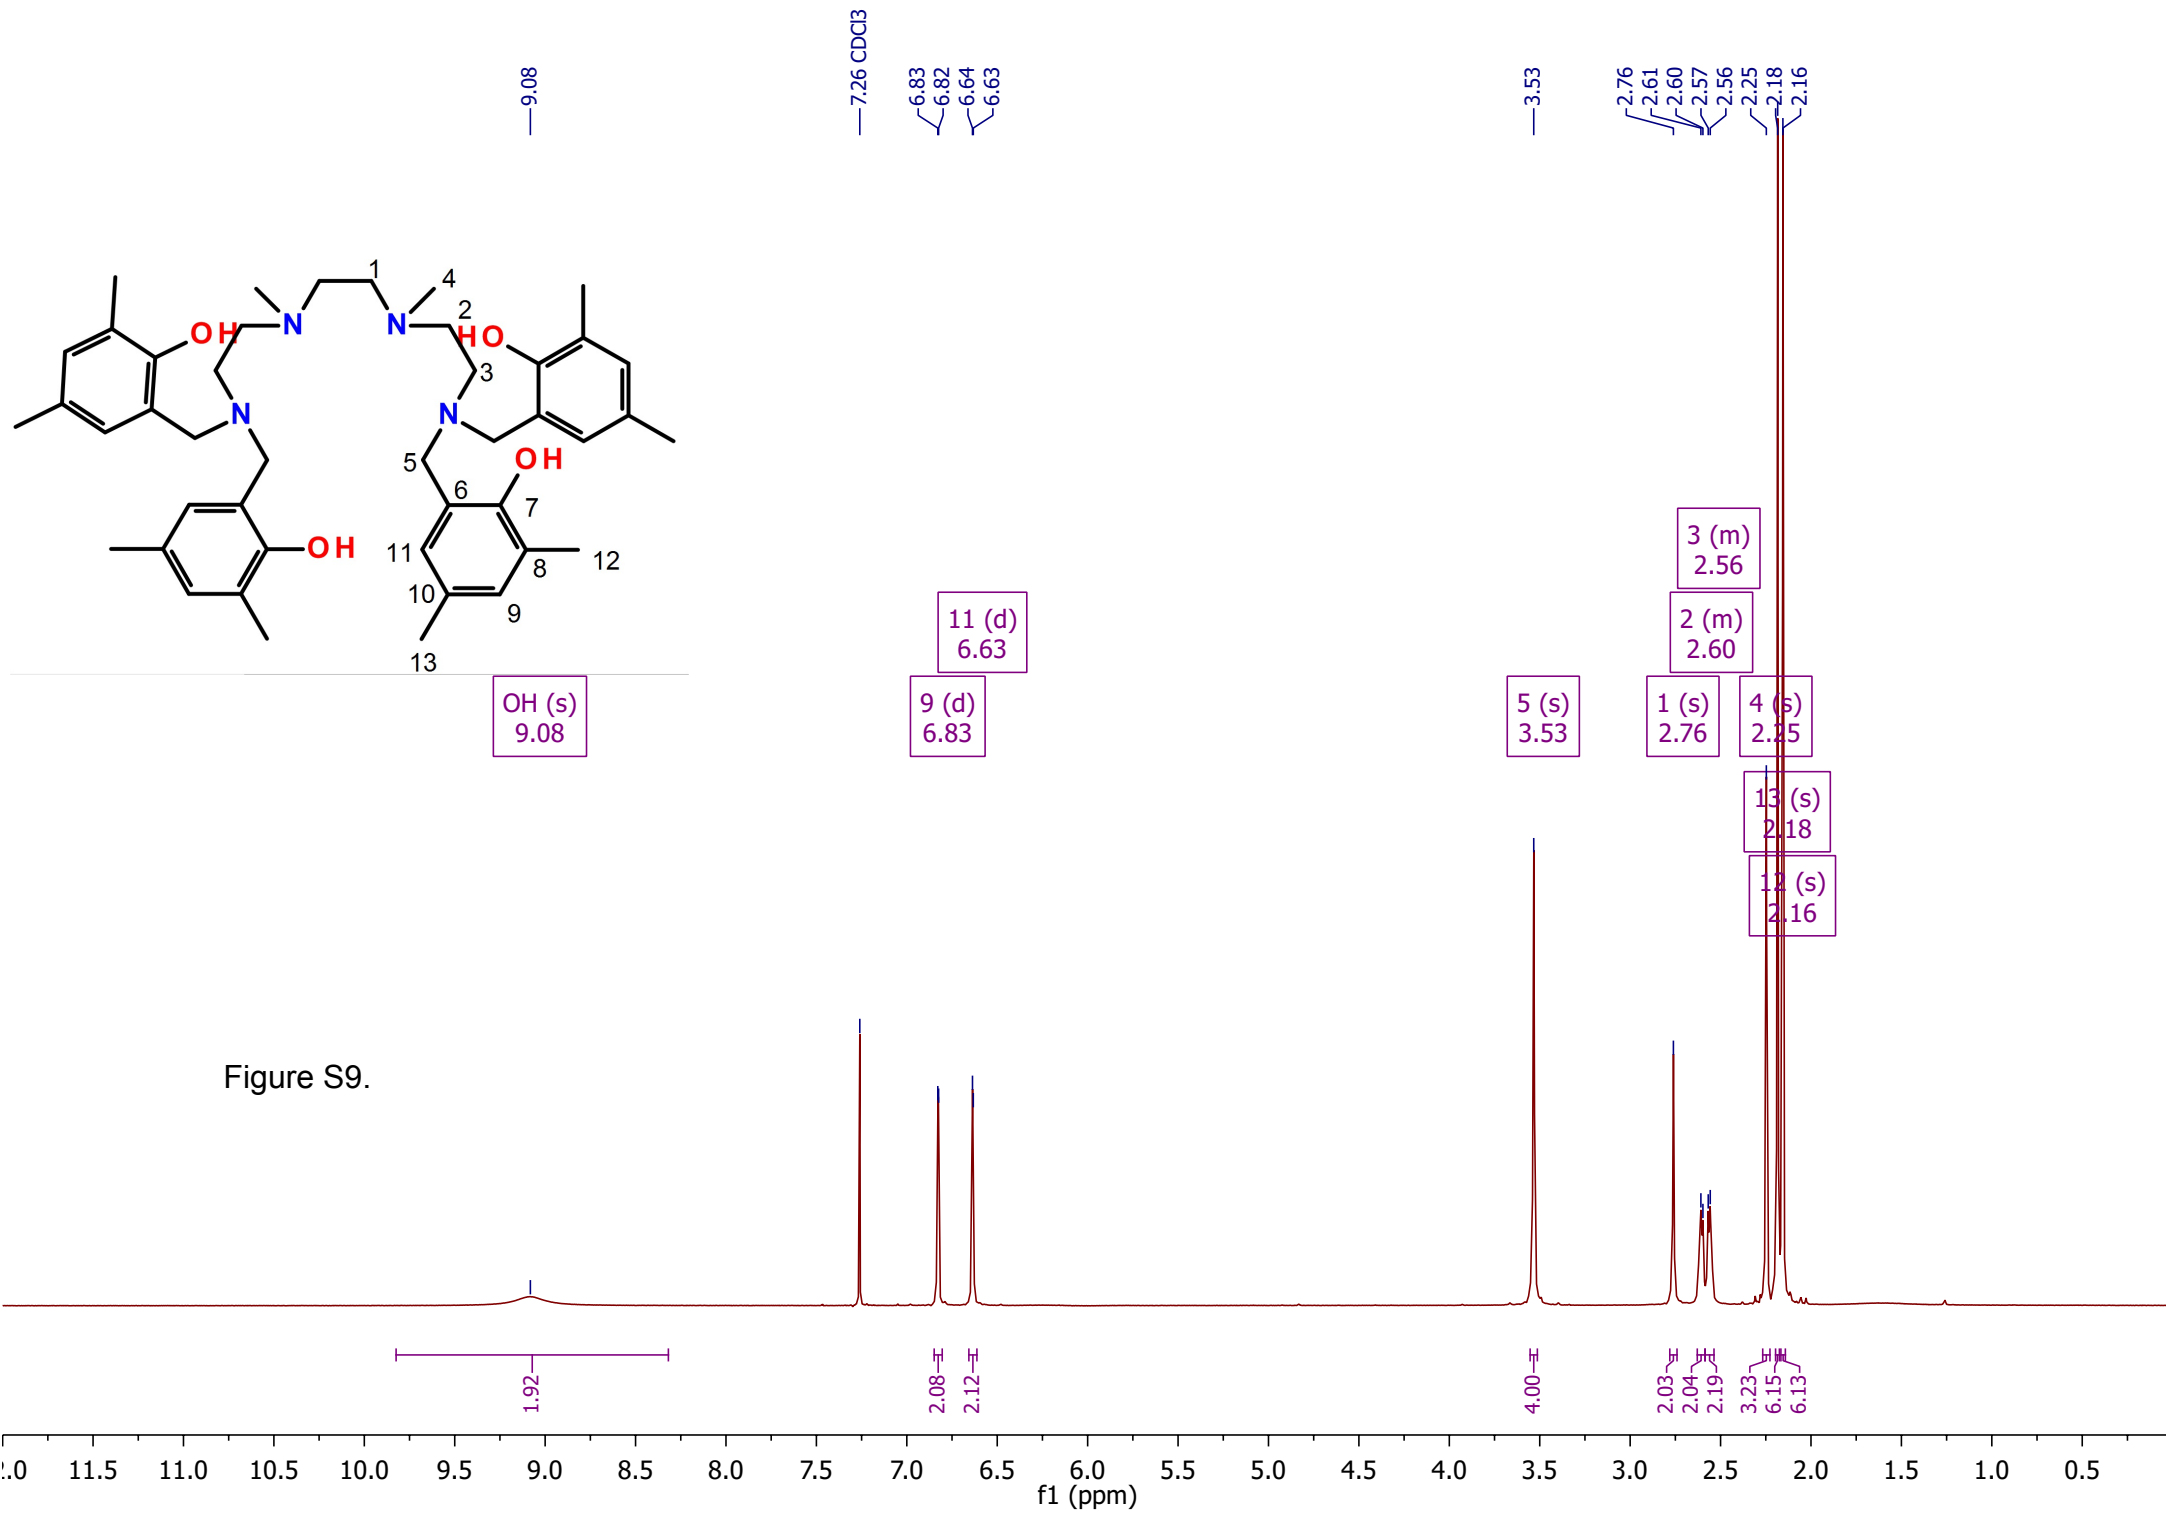

Figure S9.

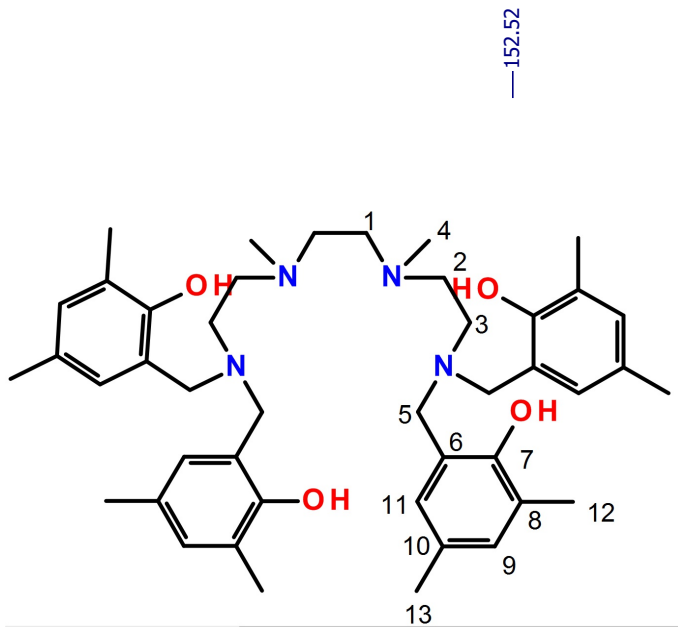

152.52

131.26

128.41

127.58

125.33

121.58

77.16 CDCl3

56.37

55.27

54.43

49.22

41.66

20.49

16.25

7

9

11

8

6

10

5

2

1

3

4

13

12

Figure S10.

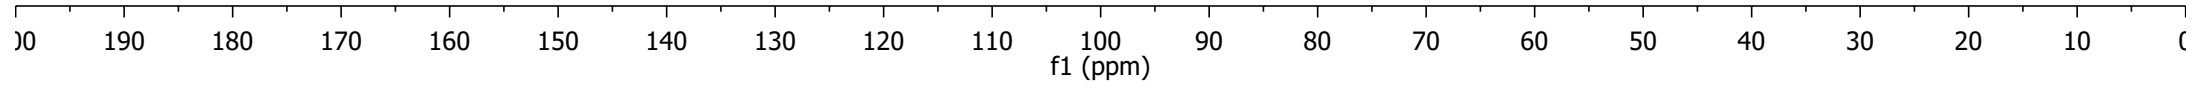

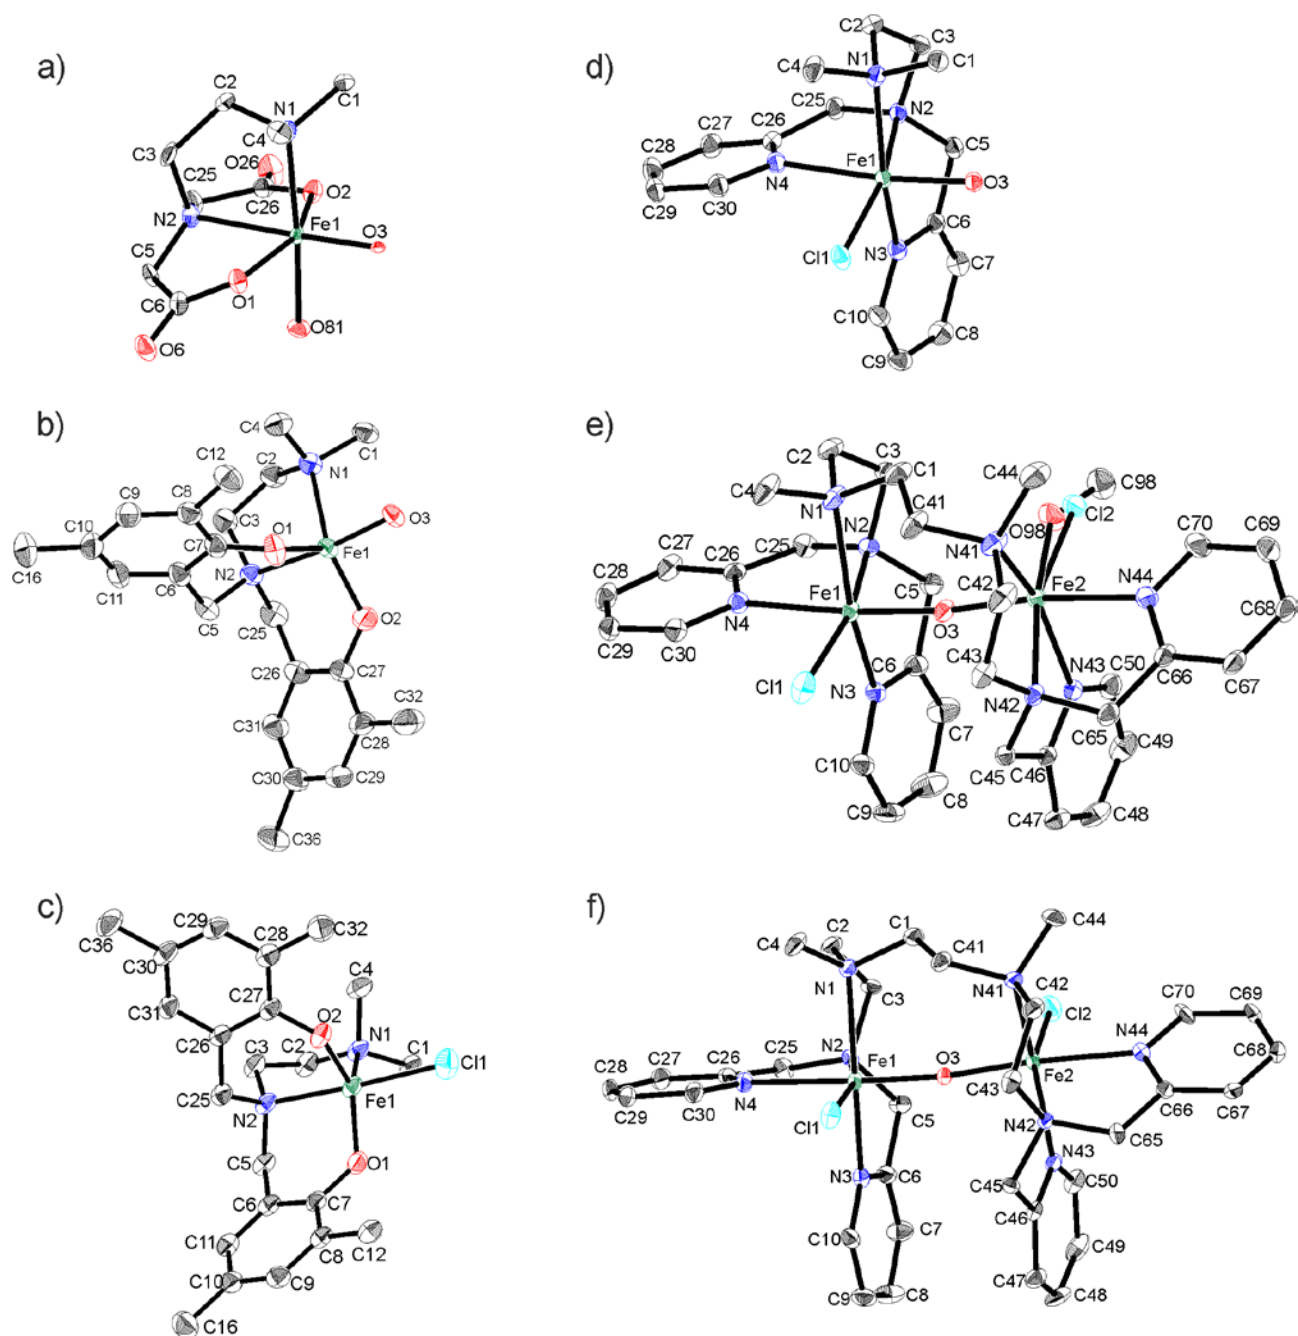

**Fig. S11.** Thermal ellipsoid plots of the asymmetric units in crystals of a)  $[(julia)\{Fe(OH_2)(\mu-O)Fe(OH_2)\}]\cdot 7H_2O$ , b)  $[(hilde^{Me_2})\{Fe(\mu-O)Fe\}]\cdot CH_2Cl_2$ , c)  $[(hilde^{Me_2})\{FeCl_2\}]\cdot 2CH_2Cl_2$ , d)  $[(susan)\{FeCl(\mu-O)FeCl\}]\cdot Cl_2\cdot 2H_2O$ , e)  $[(susan)\{FeCl(\mu-O)FeCl_{0.75}(OCH_3)_{0.25}\}]\cdot (ClO_4)_2\cdot 0.5MeOH$ , and f)  $[(susan)\{FeCl(\mu-O)FeCl\}]\cdot (ClO_4)_2\cdot 0.5EtOH$  with the numbering scheme used. Thermal ellipsoids are drawn at the 50 % probability level; non-coordinating solvent molecules and hydrogen atoms are omitted for clarity.

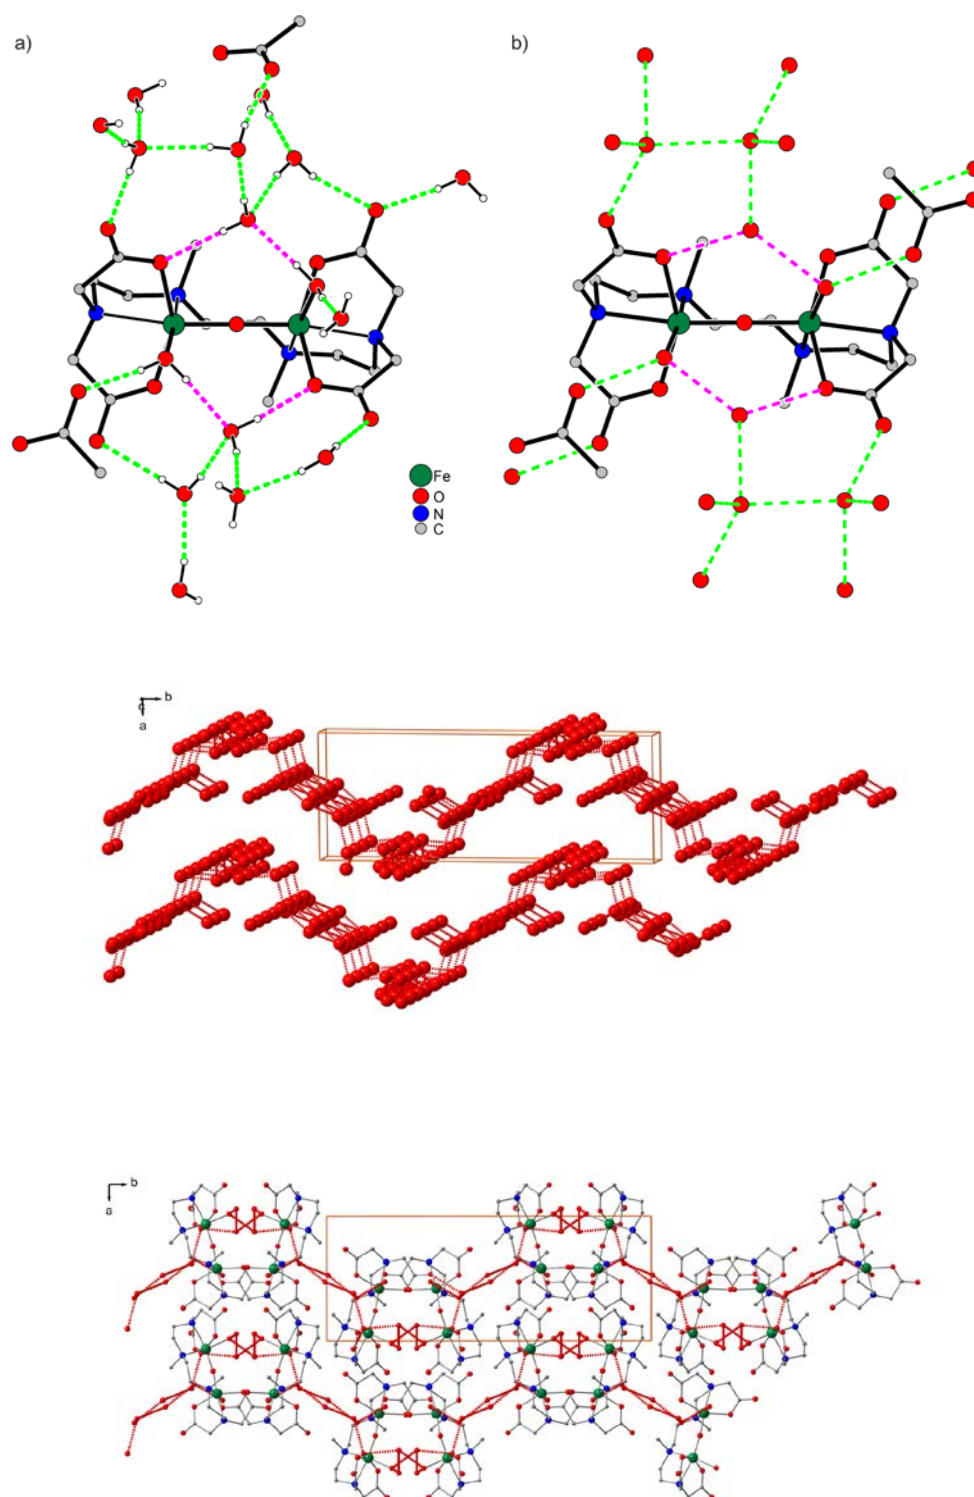

**Fig. S12.** Sections of the hydrogen bonding networks around the  $[(julia)\{Fe(OH_2)(\mu-O)Fe(OH_2)\}]$  complexes in crystals of a)  $[(julia)\{Fe(OH_2)(\mu-O)Fe(OH_2)\}] \cdot 6H_2O$  and b)  $[(julia)\{Fe(OH_2)(\mu-O)Fe(OH_2)\}] \cdot 7H_2O$ . c) Curled layers of water molecules in the crystals structure of  $[(julia)\{Fe(OH_2)(\mu-O)Fe(OH_2)\}] \cdot 6H_2O$  and d) including the dinuclear complexes appended to these layers.

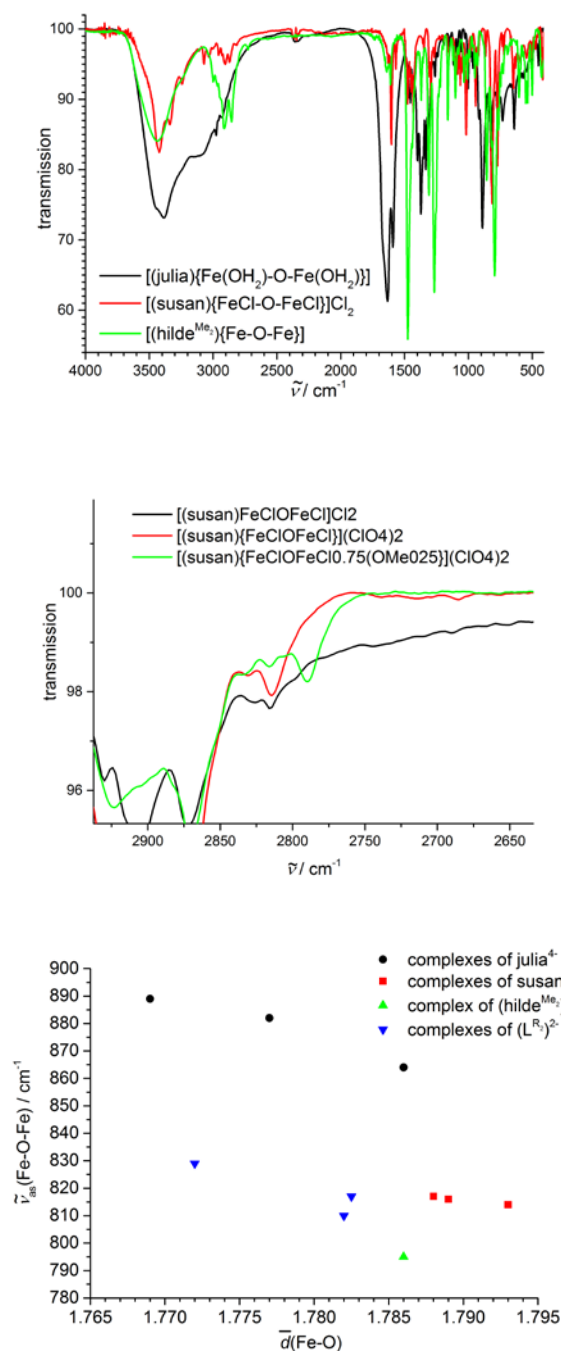

**Fig. S13.** a) FTIR spectra of three selected dinuclear complexes as representative examples for each dinucleating ligand. b) Section of the FTIR spectra of the three different [(susan){FeCl( $\mu$ -O)FeCl}]Cl<sub>2</sub> complexes demonstrating the appearance of the  $\nu$ (C-H) stretch at 2790 cm<sup>-1</sup> of the 25 % coordinated methanolate in [(susan){FeCl( $\mu$ -O)FeCl<sub>0.75</sub>(OCH<sub>3</sub>)<sub>0.25</sub>}]ClO<sub>4</sub>)<sub>2</sub>, which is absent in the spectra of the pure complexes [(susan){FeCl( $\mu$ -O)FeCl}]<sup>2+</sup>. c) Dependence of the  $\nu_{as}$ (Fe-O-Fe) stretch from the mean bond length  $\bar{d}$ (Fe-O) for dinuclear complexes with a central {Fe<sup>III</sup>( $\mu$ -O)Fe<sup>III</sup>} core.

**Figure S14.** Temperature-dependence of the effective magnetic moment,  $\mu_{\text{eff}}$ , of the complexes indicated in the figure at 1 T. The solid lines are the fits to the experimental data (black dots), while the dashed lines correspond to paramagnetic  $S = 5/2$  impurities.

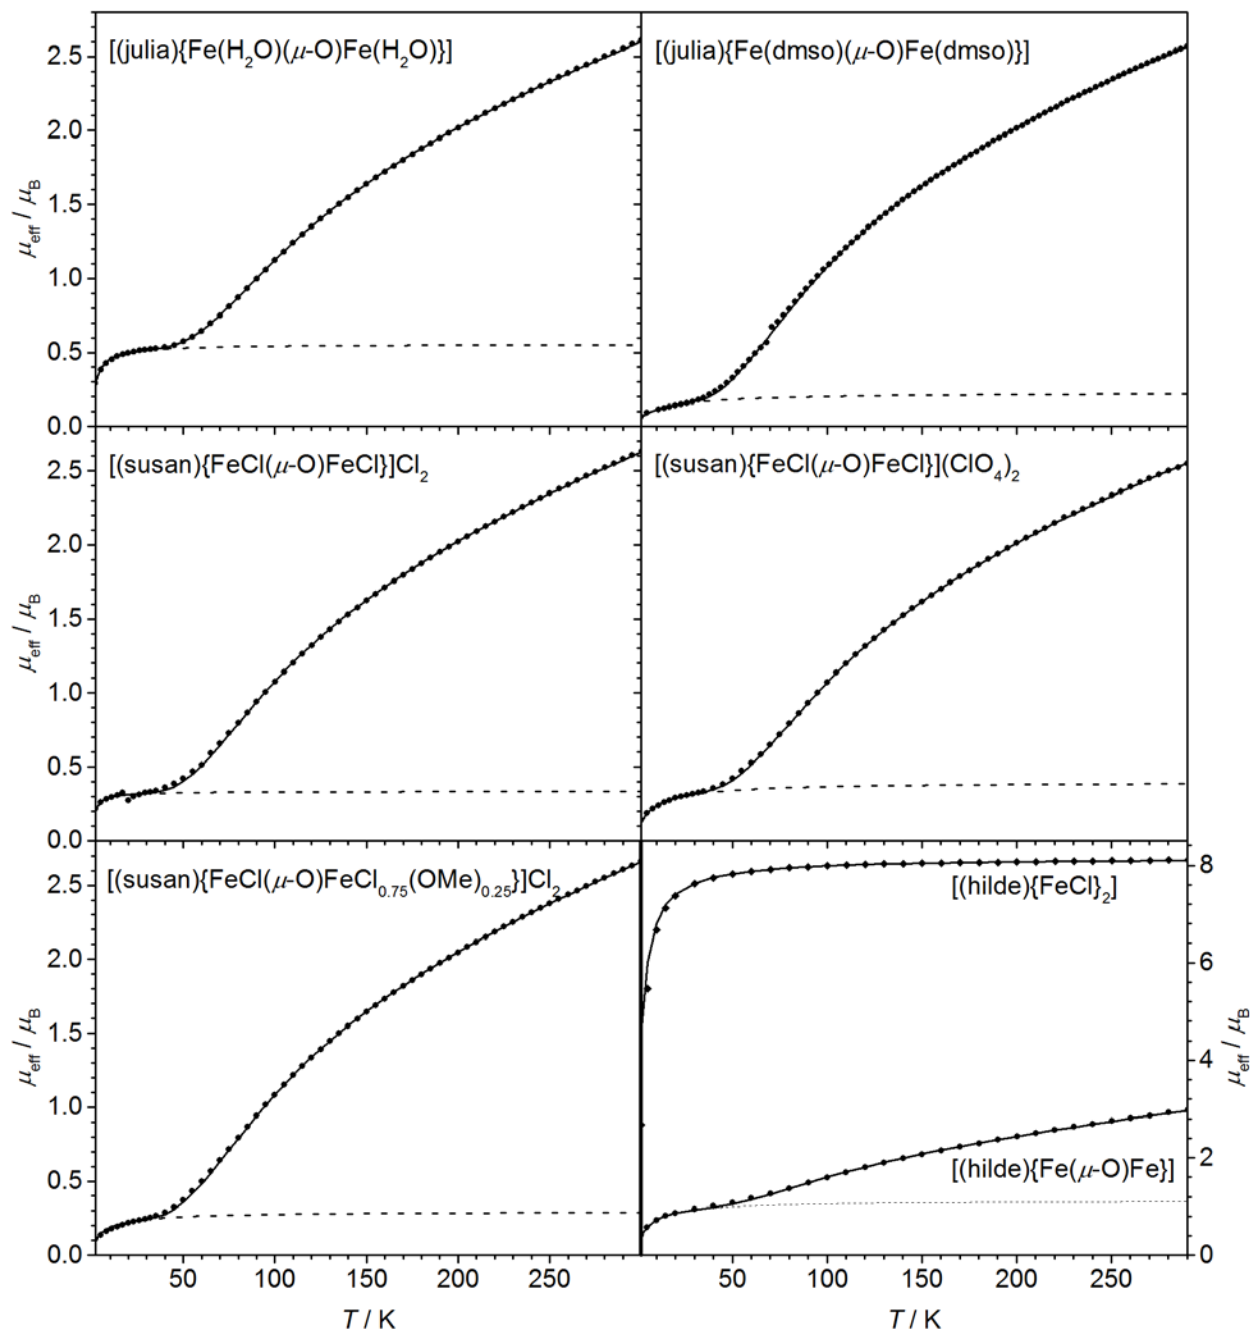

**Figure S15.**  $^{57}\text{Fe}$  Mössbauer spectra of the complexes indicated in the figure at 80 K. The solid lines correspond to the fit of the experimental spectra given as dots.

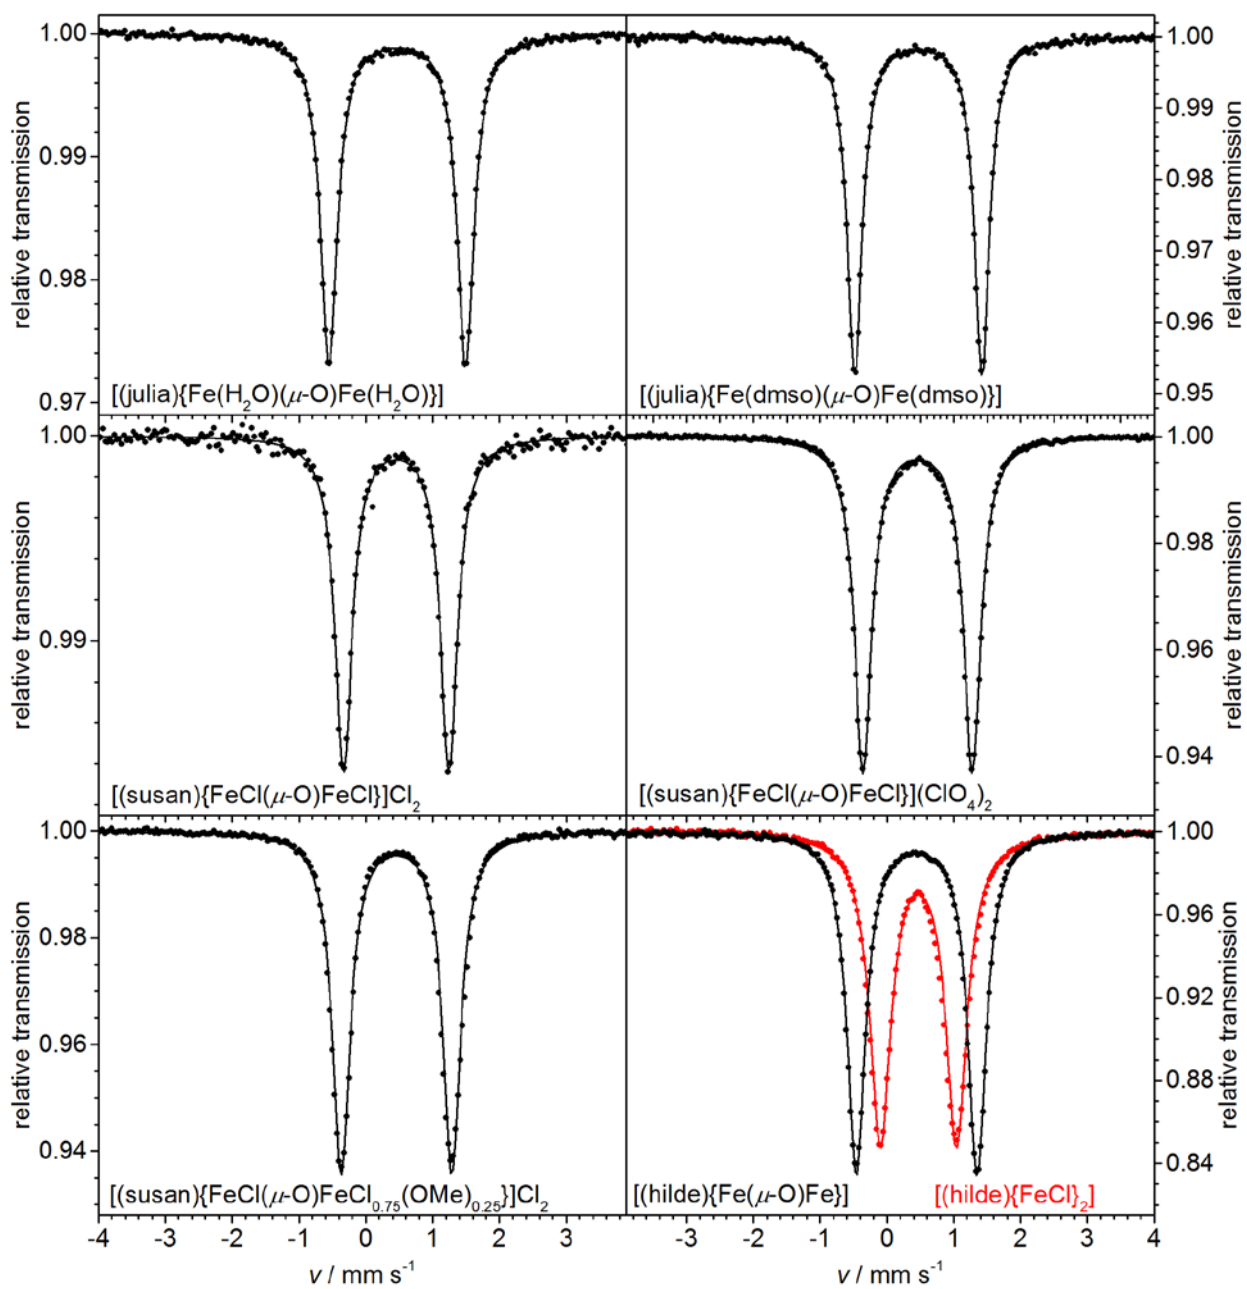



**Table S1.** Bond lengths [Å] and angles [°] for [(julia){Fe(OH<sub>2</sub>)(μ-O)Fe(OH<sub>2</sub>)}]•7H<sub>2</sub>O.

|            |            |               |            |
|------------|------------|---------------|------------|
| Fe1-O3     | 1.7769(8)  | O2-Fe1-N2     | 78.29(13)  |
| Fe1-N1     | 2.190(4)   | O1-Fe1-N2     | 75.77(13)  |
| Fe1-N2     | 2.223(4)   | O81-Fe1-N2    | 90.86(13)  |
| Fe1-O1     | 2.033(3)   | N1-Fe1-N2     | 82.43(14)  |
| Fe1-O2     | 2.032(3)   | O3-Fe1-Fe1#1  | 145.42(3)  |
| Fe1-O81    | 2.085(3)   | O2-Fe1-Fe1#1  | 46.08(9)   |
| Fe1-Fe1#1  | 36.343(2)  | O1-Fe1-Fe1#1  | 108.10(9)  |
| O1-C6      | 1.295(6)   | O81-Fe1-Fe1#1 | 65.40(9)   |
| O2-C26     | 1.273(6)   | N1-Fe1-Fe1#1  | 104.96(10) |
| O3-Fe1#2   | 1.7770(8)  | N2-Fe1-Fe1#1  | 42.51(9)   |
| N1-C2      | 1.490(6)   | C6-O1-Fe1     | 117.7(3)   |
| N1-C4      | 1.492(5)   | C26-O2-Fe1    | 119.6(3)   |
| N1-C1      | 1.501(6)   | Fe1-O3-Fe1#2  | 164.6(3)   |
| N2-C5      | 1.468(6)   | C2-N1-C4      | 109.3(4)   |
| N2-C25     | 1.485(6)   | C2-N1-C1      | 105.1(4)   |
| N2-C3      | 1.486(6)   | C4-N1-C1      | 109.8(4)   |
| O6-C6      | 1.236(6)   | C2-N1-Fe1     | 106.2(3)   |
| O26-C26    | 1.239(6)   | C4-N1-Fe1     | 109.5(3)   |
| C1-C1#2    | 1.510(9)   | C1-N1-Fe1     | 116.5(3)   |
| C1-H1A     | 0.9900     | C5-N2-C25     | 115.1(4)   |
| C1-H1B     | 0.9900     | C5-N2-C3      | 109.8(4)   |
| C2-C3      | 1.513(7)   | C25-N2-C3     | 112.2(4)   |
| C2-H2A     | 0.9900     | C5-N2-Fe1     | 106.2(3)   |
| C2-H2B     | 0.9900     | C25-N2-Fe1    | 108.0(3)   |
| C3-H3A     | 0.9900     | C3-N2-Fe1     | 104.9(3)   |
| C3-H3B     | 0.9900     | N1-C1-C1#2    | 121.1(4)   |
| C4-H4A     | 0.9800     | N1-C1-H1A     | 107.0      |
| C4-H4B     | 0.9800     | C1#2-C1-H1A   | 107.0      |
| C4-H4C     | 0.9800     | N1-C1-H1B     | 107.0      |
| C5-C6      | 1.520(6)   | C1#2-C1-H1B   | 107.0      |
| C5-H5A     | 0.9900     | H1A-C1-H1B    | 106.8      |
| C5-H5B     | 0.9900     | N1-C2-C3      | 111.1(4)   |
| C25-C26    | 1.517(6)   | N1-C2-H2A     | 109.4      |
| C25-H25A   | 0.9900     | C3-C2-H2A     | 109.4      |
| C25-H25B   | 0.9900     | N1-C2-H2B     | 109.4      |
|            |            | C3-C2-H2B     | 109.4      |
| O3-Fe1-O2  | 107.77(10) | H2A-C2-H2B    | 108.0      |
| O3-Fe1-O1  | 98.68(11)  | N2-C3-C2      | 111.0(4)   |
| O2-Fe1-O1  | 153.24(13) | N2-C3-H3A     | 109.4      |
| O3-Fe1-O81 | 94.70(15)  | C2-C3-H3A     | 109.4      |
| O2-Fe1-O81 | 85.72(14)  | N2-C3-H3B     | 109.4      |
| O1-Fe1-O81 | 88.19(13)  | C2-C3-H3B     | 109.4      |
| O3-Fe1-N1  | 92.72(15)  | H3A-C3-H3B    | 108.0      |
| O2-Fe1-N1  | 85.89(14)  | N1-C4-H4A     | 109.5      |
| O1-Fe1-N1  | 97.05(14)  | N1-C4-H4B     | 109.5      |
| O81-Fe1-N1 | 170.17(13) | H4A-C4-H4B    | 109.5      |
| O3-Fe1-N2  | 172.03(11) | N1-C4-H4C     | 109.5      |
| H4A-C4-H4C | 109.5      |               |            |
| H4B-C4-H4C | 109.5      |               |            |
| N2-C5-C6   | 110.0(4)   |               |            |
| N2-C5-H5A  | 109.7      |               |            |
| C6-C5-H5A  | 109.7      |               |            |

|               |          |  |  |  |
|---------------|----------|--|--|--|
| N2-C5-H5B     | 109.7    |  |  |  |
| C6-C5-H5B     | 109.7    |  |  |  |
| H5A-C5-H5B    | 108.2    |  |  |  |
| O6-C6-O1      | 125.2(4) |  |  |  |
| O6-C6-C5      | 118.6(4) |  |  |  |
| O1-C6-C5      | 116.2(4) |  |  |  |
| N2-C25-C26    | 112.3(4) |  |  |  |
| N2-C25-H25A   | 109.1    |  |  |  |
| C26-C25-H25A  | 109.1    |  |  |  |
| N2-C25-H25B   | 109.1    |  |  |  |
| C26-C25-H25B  | 109.1    |  |  |  |
| H25A-C25-H25B | 107.9    |  |  |  |
| O26-C26-O2    | 123.7(4) |  |  |  |
| O26-C26-C25   | 118.4(4) |  |  |  |
| O2-C26-C25    | 117.9(4) |  |  |  |

---

Symmetry transformations used to generate equivalent atoms:

#1 -x,y,-z+1 #2 -x+2,y,-z+1

**Table S2.** Bond lengths [Å] and angles [°] for [(susan){FeCl( $\mu$ -O)FeCl}]Cl<sub>2</sub>•2H<sub>2</sub>O.

|           |            |  |              |             |
|-----------|------------|--|--------------|-------------|
| Fe1-O3    | 1.7932(3)  |  | O99-H99A     | 0.99(3)     |
| Fe1-N1    | 2.2330(13) |  | O99-H99B     | 1.04(4)     |
| Fe1-N2    | 2.2019(13) |  |              |             |
| Fe1-N3    | 2.1741(14) |  | O3-Fe1-N3    | 90.55(6)    |
| Fe1-N4    | 2.2278(13) |  | O3-Fe1-N2    | 93.48(3)    |
| Fe1-Cl1   | 2.3099(4)  |  | N3-Fe1-N2    | 74.48(5)    |
| O3-Fe1#1  | 1.7932(3)  |  | O3-Fe1-N4    | 170.27(4)   |
| N1-C4     | 1.483(2)   |  | N3-Fe1-N4    | 87.15(5)    |
| N1-C2     | 1.491(2)   |  | N2-Fe1-N4    | 76.79(5)    |
| N1-C1     | 1.498(2)   |  | O3-Fe1-N1    | 90.16(5)    |
| N2-C5     | 1.4860(19) |  | N3-Fe1-N1    | 156.44(5)   |
| N2-C3     | 1.487(2)   |  | N2-Fe1-N1    | 81.98(5)    |
| N2-C25    | 1.4891(19) |  | N4-Fe1-N1    | 88.21(5)    |
| N3-C10    | 1.344(2)   |  | O3-Fe1-Cl1   | 100.719(14) |
| N3-C6     | 1.347(2)   |  | N3-Fe1-Cl1   | 97.39(4)    |
| N4-C26    | 1.342(2)   |  | N2-Fe1-Cl1   | 163.78(4)   |
| N4-C30    | 1.353(2)   |  | N4-Fe1-Cl1   | 88.96(4)    |
| C1-C1#1   | 1.535(3)   |  | N1-Fe1-Cl1   | 105.60(4)   |
| C1-H1A    | 0.9900     |  | Fe1#1-O3-Fe1 | 171.47(9)   |
| C1-H1B    | 0.9900     |  | C4-N1-C2     | 109.20(12)  |
| C2-C3     | 1.514(2)   |  | C4-N1-C1     | 108.56(12)  |
| C2-H2A    | 0.9900     |  | C2-N1-C1     | 109.12(12)  |
| C2-H2B    | 0.9900     |  | C4-N1-Fe1    | 112.89(10)  |
| C3-H3A    | 0.9900     |  | C2-N1-Fe1    | 105.00(9)   |
| C3-H3B    | 0.9900     |  | C1-N1-Fe1    | 111.96(9)   |
| C4-H4A    | 0.9800     |  | C5-N2-C3     | 112.38(12)  |
| C4-H4B    | 0.9800     |  | C5-N2-C25    | 109.44(12)  |
| C4-H4C    | 0.9800     |  | C3-N2-C25    | 112.25(12)  |
| C5-C6     | 1.509(2)   |  | C5-N2-Fe1    | 104.34(9)   |
| C5-H5A    | 0.9900     |  | C3-N2-Fe1    | 105.11(9)   |
| C5-H5B    | 0.9900     |  | C25-N2-Fe1   | 113.03(9)   |
| C6-C7     | 1.389(2)   |  | C10-N3-C6    | 119.24(14)  |
| C7-C8     | 1.385(2)   |  | C10-N3-Fe1   | 126.91(11)  |
| C7-H7A    | 0.9500     |  | C6-N3-Fe1    | 113.35(10)  |
| C8-C9     | 1.388(2)   |  | C26-N4-C30   | 118.46(13)  |
| C8-H8A    | 0.9500     |  | C26-N4-Fe1   | 114.52(10)  |
| C9-C10    | 1.385(2)   |  | C30-N4-Fe1   | 125.47(11)  |
| C9-H9A    | 0.9500     |  | N1-C1-C1#1   | 112.53(15)  |
| C10-H10A  | 0.9500     |  | N1-C1-H1A    | 109.1       |
| C25-C26   | 1.508(2)   |  | C1#1-C1-H1A  | 109.1       |
| C25-H25A  | 0.9900     |  | N1-C1-H1B    | 109.1       |
| C25-H25B  | 0.9900     |  | C1#1-C1-H1B  | 109.1       |
| C26-C27   | 1.395(2)   |  | H1A-C1-H1B   | 107.8       |
| C27-C28   | 1.380(2)   |  | N1-C2-C3     | 111.43(13)  |
| C27-H27A  | 0.9500     |  | N1-C2-H2A    | 109.3       |
| C28-C29   | 1.388(3)   |  | C3-C2-H2A    | 109.3       |
| C28-H28A  | 0.9500     |  | N1-C2-H2B    | 109.3       |
| C29-C30   | 1.383(2)   |  | C3-C2-H2B    | 109.3       |
| C29-H29A  | 0.9500     |  | H2A-C2-H2B   | 108.0       |
| C30-H30A  | 0.9500     |  | N2-C3-C2     | 109.17(12)  |
| N2-C3-H3A | 109.8      |  | C9-C8-H8A    | 120.2       |
| C2-C3-H3A | 109.8      |  | C10-C9-C8    | 118.48(15)  |
| N2-C3-H3B | 109.8      |  | C10-C9-H9A   | 120.8       |
| C2-C3-H3B | 109.8      |  | C8-C9-H9A    | 120.8       |

|            |            |  |                   |            |
|------------|------------|--|-------------------|------------|
| H3A-C3-H3B | 108.3      |  | N3-C10-C9         | 122.17(15) |
| N1-C4-H4A  | 109.5      |  | N3-C10-H10A       | 118.9      |
| N1-C4-H4B  | 109.5      |  | C9-C10-H10A       | 118.9      |
| H4A-C4-H4B | 109.5      |  | N2-C25-C26        | 113.96(12) |
| N1-C4-H4C  | 109.5      |  | N2-C25-H25A       | 108.8      |
| H4A-C4-H4C | 109.5      |  | C26-C25-H25A      | 108.8      |
| H4B-C4-H4C | 109.5      |  | N2-C25-H25B       | 108.8      |
| N2-C5-C6   | 108.06(12) |  | C26-C25-H25B      | 108.8      |
| N2-C5-H5A  | 110.1      |  | H25A-C25-<br>H25B | 107.7      |
| C6-C5-H5A  | 110.1      |  | N4-C26-C27        | 121.98(14) |
| N2-C5-H5B  | 110.1      |  | N4-C26-C25        | 117.85(13) |
| C6-C5-H5B  | 110.1      |  | C27-C26-C25       | 120.12(14) |
| H5A-C5-H5B | 108.4      |  | C28-C27-C26       | 118.97(15) |
| N3-C6-C7   | 121.68(14) |  | C28-C27-H27A      | 120.5      |
| N3-C6-C5   | 115.87(13) |  | C26-C27-H27A      | 120.5      |
| C7-C6-C5   | 122.45(14) |  | C27-C28-C29       | 119.38(15) |
| C8-C7-C6   | 118.77(15) |  | C27-C28-H28A      | 120.3      |
| C8-C7-H7A  | 120.6      |  | C29-C28-H28A      | 120.3      |
| C6-C7-H7A  | 120.6      |  | C30-C29-C28       | 118.57(16) |
| C7-C8-C9   | 119.62(16) |  | C30-C29-H29A      | 120.7      |
| C7-C8-H8A  | 120.2      |  | C28-C29-H29A      | 120.7      |
|            |            |  | N4-C30-C29        | 122.52(15) |
|            |            |  | N4-C30-H30A       | 118.7      |
|            |            |  | C29-C30-H30A      | 118.7      |
|            |            |  | H99A-O99-<br>H99B | 102(2)     |
|            |            |  |                   |            |
|            |            |  |                   |            |
|            |            |  |                   |            |

---

Symmetry transformations used to generate equivalent atoms:

#1 -x,y,-z+3/2

**Table S3.** Bond lengths [Å] and angles [°] for [(susan){FeCl( $\mu$ -O)FeCl<sub>0.75</sub>(OCH<sub>3</sub>)<sub>0.25</sub>]}(ClO<sub>4</sub>)<sub>2</sub>•0.5MeOH.

|          |            |             |            |
|----------|------------|-------------|------------|
| Fe1-O3   | 1.7786(10) | C5-C6       | 1.505(2)   |
| Fe2-O3   | 1.7974(10) | C5-H5A      | 0.9900     |
| Fe1-N1   | 2.2614(13) | C5-H5B      | 0.9900     |
| Fe2-N41  | 2.2501(14) | C6-C7       | 1.385(2)   |
| Fe1-N2   | 2.2052(13) | C7-C8       | 1.383(3)   |
| Fe2-N42  | 2.2204(13) | C7-H7       | 0.9500     |
| Fe1-N3   | 2.1653(12) | C8-C9       | 1.375(3)   |
| Fe1-N4   | 2.2559(13) | C8-H8       | 0.9500     |
| Fe2-N43  | 2.1608(13) | C9-C10      | 1.382(2)   |
| Fe2-N44  | 2.2011(13) | C9-H9       | 0.9500     |
| Fe1-Cl1  | 2.2982(5)  | C10-H10     | 0.9500     |
| Fe2-Cl2  | 2.3311(11) | C25-C26     | 1.496(2)   |
| Fe2-O98  | 1.745(6)   | C25-H25A    | 0.9900     |
| Fe1-Fe2  | 3.5693(4)  | C25-H25B    | 0.9900     |
| O98-C98  | 1.416(10)  | C26-C27     | 1.392(2)   |
| C98-H98A | 0.9800     | C27-C28     | 1.377(2)   |
| C98-H98B | 0.9800     | C27-H27     | 0.9500     |
| C98-H98C | 0.9800     | C28-C29     | 1.382(3)   |
| N1-C4    | 1.484(2)   | C28-H28     | 0.9500     |
| N1-C2    | 1.489(2)   | C29-C30     | 1.372(2)   |
| N1-C1    | 1.493(2)   | C29-H29     | 0.9500     |
| N2-C5    | 1.4772(19) | C30-H30     | 0.9500     |
| N2-C3    | 1.4817(19) | C41-H41A    | 0.9900     |
| N2-C25   | 1.4825(19) | C41-H41B    | 0.9900     |
| N3-C10   | 1.3435(19) | C42-C43     | 1.512(2)   |
| N3-C6    | 1.344(2)   | C42-H42A    | 0.9900     |
| N4-C26   | 1.3387(19) | C42-H42B    | 0.9900     |
| N4-C30   | 1.349(2)   | C43-H43A    | 0.9900     |
| N41-C44  | 1.485(2)   | C43-H43B    | 0.9900     |
| N41-C41  | 1.495(2)   | C44-H44A    | 0.9800     |
| N41-C42  | 1.495(2)   | C44-H44B    | 0.9800     |
| N44-C66  | 1.338(2)   | C44-H44C    | 0.9800     |
| N44-C70  | 1.350(2)   | C45-C46     | 1.507(2)   |
| N42-C43  | 1.4823(19) | C45-H45A    | 0.9900     |
| N42-C45  | 1.4841(18) | C45-H45B    | 0.9900     |
| N42-C65  | 1.4844(18) | C46-C47     | 1.387(2)   |
| N43-C46  | 1.3434(19) | C47-C48     | 1.387(2)   |
| N43-C50  | 1.346(2)   | C47-H47     | 0.9500     |
| C1-C41   | 1.527(2)   | C48-C49     | 1.385(3)   |
| C1-H1A   | 0.9900     | C48-H48     | 0.9500     |
| C1-H1B   | 0.9900     | C49-C50     | 1.379(2)   |
| C2-C3    | 1.516(2)   | C49-H49     | 0.9500     |
| C2-H2A   | 0.9900     | C50-H50     | 0.9500     |
| C2-H2B   | 0.9900     | C65-C66     | 1.501(2)   |
| C3-H3A   | 0.9900     | C65-H65A    | 0.9900     |
| C3-H3B   | 0.9900     | C65-H65B    | 0.9900     |
| C4-H4A   | 0.9800     | C66-C67     | 1.387(2)   |
| C4-H4B   | 0.9800     | C67-C68     | 1.376(3)   |
| C4-H4C   | 0.9800     | C67-H67     | 0.9500     |
| C68-C69  | 1.380(3)   | N43-Fe2-N44 | 87.31(5)   |
| C68-H68  | 0.9500     | O98-Fe2-N42 | 169.78(19) |
| C69-C70  | 1.373(2)   | O3-Fe2-N42  | 94.60(5)   |
| C69-H69  | 0.9500     | N43-Fe2-N42 | 74.17(5)   |

|             |             |               |            |
|-------------|-------------|---------------|------------|
| C70-H70     | 0.9500      | N44-Fe2-N42   | 76.57(5)   |
| Cl3-O33     | 1.4310(14)  | O98-Fe2-N41   | 95.7(2)    |
| Cl3-O32     | 1.4368(13)  | O3-Fe2-N41    | 90.14(5)   |
| Cl3-O34     | 1.4370(15)  | N43-Fe2-N41   | 154.94(5)  |
| Cl3-O31     | 1.4384(14)  | N44-Fe2-N41   | 88.16(5)   |
| Cl4-O42     | 1.4323(12)  | N42-Fe2-N41   | 80.81(5)   |
| Cl4-O41     | 1.4392(13)  | O98-Fe2-Cl2   | 12.7(2)    |
| Cl4-O43     | 1.4445(11)  | O3-Fe2-Cl2    | 99.62(4)   |
| Cl4-O44     | 1.4447(12)  | N43-Fe2-Cl2   | 97.18(4)   |
| C1M-C1MB#1  | 0.40(2)     | N44-Fe2-Cl2   | 89.15(4)   |
| C1M-O1MB    | 0.988(17)   | N42-Fe2-Cl2   | 163.46(4)  |
| C1M-O1MB#1  | 0.988(17)   | N41-Fe2-Cl2   | 107.39(4)  |
| C1M-O1M     | 1.477(4)    | O98-Fe2-Fe1   | 92.67(19)  |
| C1M-O1M#1   | 1.477(4)    | O3-Fe2-Fe1    | 3.49(3)    |
| O1M-C1MB#1  | 1.149(19)   | N43-Fe2-Fe1   | 93.80(3)   |
| O1M-O1MB    | 1.519(17)   | N44-Fe2-Fe1   | 172.72(4)  |
| O1M-C1MB    | 1.84(2)     | N42-Fe2-Fe1   | 96.79(3)   |
| O1MB-C1MB#1 | 0.79(2)     | N41-Fe2-Fe1   | 87.81(4)   |
| O1MB-C1MB   | 1.29(3)     | Cl2-Fe2-Fe1   | 97.846(19) |
| C1MB-O1MB#1 | 0.79(2)     | C98-O98-Fe2   | 142.1(6)   |
| C1MB-C1MB#1 | 0.80(4)     | O98-C98-H98A  | 109.5      |
| C1MB-O1M#1  | 1.149(19)   | O98-C98-H98B  | 109.5      |
|             |             | H98A-C98-H98B | 109.5      |
| O3-Fe1-N3   | 90.94(5)    | O98-C98-H98C  | 109.5      |
| O3-Fe1-N2   | 95.88(5)    | H98A-C98-H98C | 109.5      |
| N3-Fe1-N2   | 75.09(5)    | H98B-C98-H98C | 109.5      |
| O3-Fe1-N4   | 171.18(5)   | Fe1-O3-Fe2    | 172.98(7)  |
| N3-Fe1-N4   | 86.89(5)    | C4-N1-C2      | 109.45(12) |
| N2-Fe1-N4   | 75.31(5)    | C4-N1-C1      | 108.76(12) |
| O3-Fe1-N1   | 90.29(5)    | C2-N1-C1      | 107.71(13) |
| N3-Fe1-N1   | 156.18(5)   | C4-N1-Fe1     | 113.97(11) |
| N2-Fe1-N1   | 81.12(5)    | C2-N1-Fe1     | 104.66(9)  |
| N4-Fe1-N1   | 88.28(5)    | C1-N1-Fe1     | 112.02(9)  |
| O3-Fe1-Cl1  | 98.95(4)    | C5-N2-C3      | 112.57(12) |
| N3-Fe1-Cl1  | 99.89(4)    | C5-N2-C25     | 109.76(12) |
| N2-Fe1-Cl1  | 164.44(4)   | C3-N2-C25     | 111.21(12) |
| N4-Fe1-Cl1  | 89.84(3)    | C5-N2-Fe1     | 103.29(9)  |
| N1-Fe1-Cl1  | 103.41(4)   | C3-N2-Fe1     | 105.10(9)  |
| O3-Fe1-Fe2  | 3.53(3)     | C25-N2-Fe1    | 114.67(9)  |
| N3-Fe1-Fe2  | 93.92(3)    | C10-N3-C6     | 119.03(13) |
| N2-Fe1-Fe2  | 94.82(3)    | C10-N3-Fe1    | 126.84(11) |
| N4-Fe1-Fe2  | 169.55(3)   | C6-N3-Fe1     | 113.63(10) |
| N1-Fe1-Fe2  | 86.80(3)    | C26-N4-C30    | 117.58(13) |
| Cl1-Fe1-Fe2 | 100.262(14) | C26-N4-Fe1    | 116.92(10) |
| O98-Fe2-O3  | 95.02(19)   | C30-N4-Fe1    | 125.31(10) |
| O98-Fe2-N43 | 109.1(2)    | C44-N41-C41   | 108.54(13) |
| O3-Fe2-N43  | 90.59(5)    | C44-N41-C42   | 108.91(13) |
| O98-Fe2-N44 | 93.77(19)   | C41-N41-C42   | 107.88(14) |
| O3-Fe2-N44  | 171.17(5)   | C44-N41-Fe2   | 113.54(12) |
| C41-N41-Fe2 | 111.92(9)   | C7-C8-H8      | 120.2      |
| C42-N41-Fe2 | 105.86(9)   | C8-C9-C10     | 118.94(15) |
| C66-N44-C70 | 118.38(14)  | C8-C9-H9      | 120.5      |
| C66-N44-Fe2 | 117.03(10)  | C10-C9-H9     | 120.5      |
| C70-N44-Fe2 | 124.46(11)  | N3-C10-C9     | 121.89(15) |
| C43-N42-C45 | 112.66(12)  | N3-C10-H10    | 119.1      |
| C43-N42-C65 | 111.33(12)  | C9-C10-H10    | 119.1      |
| C45-N42-C65 | 110.21(11)  | N2-C25-C26    | 113.75(12) |

|               |            |                   |            |
|---------------|------------|-------------------|------------|
| C43-N42-Fe2   | 105.26(9)  | N2-C25-H25A       | 108.8      |
| C45-N42-Fe2   | 104.32(8)  | C26-C25-H25A      | 108.8      |
| C65-N42-Fe2   | 112.80(9)  | N2-C25-H25B       | 108.8      |
| C46-N43-C50   | 119.07(13) | C26-C25-H25B      | 108.8      |
| C46-N43-Fe2   | 114.55(10) | H25A-C25-H25B     | 107.7      |
| C50-N43-Fe2   | 125.80(11) | N4-C26-C27        | 122.32(14) |
| N1-C1-C41     | 113.50(14) | N4-C26-C25        | 117.58(13) |
| N1-C1-H1A     | 108.9      | C27-C26-C25       | 120.01(14) |
| C41-C1-H1A    | 108.9      | C28-C27-C26       | 118.97(15) |
| N1-C1-H1B     | 108.9      | C28-C27-H27       | 120.5      |
| C41-C1-H1B    | 108.9      | C26-C27-H27       | 120.5      |
| H1A-C1-H1B    | 107.7      | C27-C28-C29       | 119.21(15) |
| N1-C2-C3      | 110.21(12) | C27-C28-H28       | 120.4      |
| N1-C2-H2A     | 109.6      | C29-C28-H28       | 120.4      |
| C3-C2-H2A     | 109.6      | C30-C29-C28       | 118.43(15) |
| N1-C2-H2B     | 109.6      | C30-C29-H29       | 120.8      |
| C3-C2-H2B     | 109.6      | C28-C29-H29       | 120.8      |
| H2A-C2-H2B    | 108.1      | N4-C30-C29        | 123.48(15) |
| N2-C3-C2      | 108.66(13) | N4-C30-H30        | 118.3      |
| N2-C3-H3A     | 110.0      | C29-C30-H30       | 118.3      |
| C2-C3-H3A     | 110.0      | N41-C41-C1        | 112.18(15) |
| N2-C3-H3B     | 110.0      | N41-C41-H41A      | 109.2      |
| C2-C3-H3B     | 110.0      | C1-C41-H41A       | 109.2      |
| H3A-C3-H3B    | 108.3      | N41-C41-H41B      | 109.2      |
| N1-C4-H4A     | 109.5      | C1-C41-H41B       | 109.2      |
| N1-C4-H4B     | 109.5      | H41A-C41-H41B     | 107.9      |
| H4A-C4-H4B    | 109.5      | N41-C42-C43       | 109.93(12) |
| N1-C4-H4C     | 109.5      | N41-C42-H42A      | 109.7      |
| H4A-C4-H4C    | 109.5      | C43-C42-H42A      | 109.7      |
| H4B-C4-H4C    | 109.5      | N41-C42-H42B      | 109.7      |
| N2-C5-C6      | 108.89(12) | C43-C42-H42B      | 109.7      |
| N2-C5-H5A     | 109.9      | H42A-C42-H42B     | 108.2      |
| C6-C5-H5A     | 109.9      | N42-C43-C42       | 109.58(14) |
| N2-C5-H5B     | 109.9      | N42-C43-H43A      | 109.8      |
| C6-C5-H5B     | 109.9      | C42-C43-H43A      | 109.8      |
| H5A-C5-H5B    | 108.3      | N42-C43-H43B      | 109.8      |
| N3-C6-C7      | 121.93(15) | C42-C43-H43B      | 109.8      |
| N3-C6-C5      | 115.21(13) | H43A-C43-H43B     | 108.2      |
| C7-C6-C5      | 122.82(15) | N41-C44-H44A      | 109.5      |
| C8-C7-C6      | 118.54(17) | N41-C44-H44B      | 109.5      |
| C8-C7-H7      | 120.7      | H44A-C44-H44B     | 109.5      |
| C6-C7-H7      | 120.7      | N41-C44-H44C      | 109.5      |
| C9-C8-C7      | 119.66(16) | H44A-C44-H44C     | 109.5      |
| C9-C8-H8      | 120.2      | H44B-C44-H44C     | 109.5      |
| N42-C45-C46   | 108.33(12) | O33-CI3-O31       | 109.38(10) |
| C46-C45-H45A  | 110.0      | O32-CI3-O31       | 109.33(9)  |
| N42-C45-H45B  | 110.0      | O34-CI3-O31       | 109.09(9)  |
| C46-C45-H45B  | 110.0      | O42-CI4-O41       | 109.89(8)  |
| H45A-C45-H45B | 108.4      | O42-CI4-O43       | 109.82(7)  |
| N43-C46-C47   | 121.63(14) | O41-CI4-O43       | 109.56(8)  |
| N43-C46-C45   | 115.49(12) | O42-CI4-O44       | 109.26(8)  |
| C47-C46-C45   | 122.87(13) | O41-CI4-O44       | 109.24(8)  |
| C46-C47-C48   | 118.82(15) | O43-CI4-O44       | 109.05(7)  |
| C46-C47-H47   | 120.6      | N42-C45-H45A      | 110.0      |
| C48-C47-H47   | 120.6      | C1MB#1-C1M-O1MB   | 49(2)      |
| C49-C48-C47   | 119.59(15) | C1MB#1-C1M-O1MB#1 | 131(2)     |

|               |            |                    |           |
|---------------|------------|--------------------|-----------|
| C49-C48-H48   | 120.2      | O1MB-C1M-O1MB#1    | 180.0(11) |
| C47-C48-H48   | 120.2      | C1MB#1-C1M-O1M     | 30(2)     |
| C50-C49-C48   | 118.35(15) | O1MB-C1M-O1M       | 73.0(10)  |
| C50-C49-H49   | 120.8      | O1MB#1-C1M-O1M     | 107.0(10) |
| C48-C49-H49   | 120.8      | C1MB#1-C1M-O1M#1   | 150(2)    |
| N43-C50-C49   | 122.52(15) | O1MB-C1M-O1M#1     | 107.0(10) |
| N43-C50-H50   | 118.7      | O1MB#1-C1M-O1M#1   | 73.0(10)  |
| C49-C50-H50   | 118.7      | O1M-C1M-O1M#1      | 180.0(3)  |
| N42-C65-C66   | 113.69(12) | C1MB#1-O1M-C1M     | 10.2(9)   |
| N42-C65-H65A  | 108.8      | C1MB#1-O1M-O1MB    | 30.4(11)  |
| C66-C65-H65A  | 108.8      | C1M-O1M-O1MB       | 38.5(7)   |
| N42-C65-H65B  | 108.8      | C1MB#1-O1M-C1MB    | 16.6(14)  |
| C66-C65-H65B  | 108.8      | C1M-O1M-C1MB       | 6.4(5)    |
| H65A-C65-H65B | 107.7      | O1MB-O1M-C1MB      | 43.9(9)   |
| N44-C66-C67   | 121.75(15) | C1MB#1-O1MB-C1M    | 22.7(18)  |
| N44-C66-C65   | 118.12(13) | C1MB#1-O1MB-C1MB   | 36(3)     |
| C67-C66-C65   | 120.12(14) | C1M-O1MB-C1MB      | 13.6(9)   |
| C68-C67-C66   | 119.15(16) | C1MB#1-O1MB-O1M    | 47.8(19)  |
| C68-C67-H67   | 120.4      | C1M-O1MB-O1M       | 68.5(10)  |
| C66-C67-H67   | 120.4      | C1MB-O1MB-O1M      | 81.2(13)  |
| C67-C68-C69   | 119.46(15) | O1MB#1-C1MB-C1MB#1 | 108(3)    |
| C67-C68-H68   | 120.3      | O1MB#1-C1MB-O1M#1  | 102(3)    |
| C69-C68-H68   | 120.3      | C1MB#1-C1MB-O1M#1  | 139(3)    |
| C70-C69-C68   | 118.44(16) | O1MB#1-C1MB-O1MB   | 144(3)    |
| C70-C69-H69   | 120.8      | C1MB#1-C1MB-O1MB   | 35.4(17)  |
| C68-C69-H69   | 120.8      | O1M#1-C1MB-O1MB    | 110.4(15) |
| N44-C70-C69   | 122.80(16) | O1MB#1-C1MB-O1M    | 90(2)     |
| N44-C70-H70   | 118.6      | C1MB#1-C1MB-O1M    | 24.0(18)  |
| C69-C70-H70   | 118.6      | O1M#1-C1MB-O1M     | 163.4(14) |
| O33-CI3-O32   | 109.33(8)  | O1MB-C1MB-O1M      | 54.9(9)   |
| O33-CI3-O34   | 110.64(10) |                    |           |
| O32-CI3-O34   | 109.05(10) |                    |           |

---

Symmetry transformations used to generate equivalent atoms:

#1 -x,-y,-z+1



**Table S4.** Bond lengths [Å] and angles [°] for [(susan){FeCl( $\mu$ -O)FeCl}](ClO<sub>4</sub>)<sub>2</sub>•0.5EtOH.

|         |            |  |             |            |
|---------|------------|--|-------------|------------|
| Fe1-O3  | 1.780(2)   |  | C8-C9       | 1.370(6)   |
| Fe2-O3  | 1.798(2)   |  | C8-H8       | 0.9500     |
| Fe1-N1  | 2.255(3)   |  | C9-C10      | 1.384(5)   |
| Fe2-N41 | 2.249(3)   |  | C9-H9       | 0.9500     |
| Fe1-N2  | 2.201(3)   |  | C10-H10     | 0.9500     |
| Fe2-N42 | 2.217(3)   |  | C25-C26     | 1.502(5)   |
| Fe1-N3  | 2.157(3)   |  | C25-H25A    | 0.9900     |
| Fe1-N4  | 2.259(3)   |  | C25-H25B    | 0.9900     |
| Fe2-N43 | 2.155(3)   |  | C26-C27     | 1.391(5)   |
| Fe2-N44 | 2.202(3)   |  | C27-C28     | 1.374(5)   |
| Fe1-Cl1 | 2.2961(10) |  | C27-H27     | 0.9500     |
| Fe2-Cl2 | 2.3166(11) |  | C28-C29     | 1.394(6)   |
| Fe1-Fe2 | 3.5721(7)  |  | C28-H28     | 0.9500     |
| N1-C4   | 1.478(4)   |  | C29-C30     | 1.378(5)   |
| N1-C1   | 1.491(4)   |  | C29-H29     | 0.9500     |
| N1-C2   | 1.493(5)   |  | C30-H30     | 0.9500     |
| N2-C5   | 1.478(4)   |  | C41-H41A    | 0.9900     |
| N2-C25  | 1.480(4)   |  | C41-H41B    | 0.9900     |
| N2-C3   | 1.483(4)   |  | C42-C43     | 1.512(5)   |
| N3-C10  | 1.344(4)   |  | C42-H42A    | 0.9900     |
| N3-C6   | 1.353(4)   |  | C42-H42B    | 0.9900     |
| N4-C26  | 1.334(4)   |  | C43-H43A    | 0.9900     |
| N4-C30  | 1.349(4)   |  | C43-H43B    | 0.9900     |
| N41-C41 | 1.491(4)   |  | C44-H44A    | 0.9800     |
| N41-C44 | 1.493(5)   |  | C44-H44B    | 0.9800     |
| N41-C42 | 1.495(5)   |  | C44-H44C    | 0.9800     |
| N42-C65 | 1.479(4)   |  | C45-C46     | 1.513(4)   |
| N42-C43 | 1.486(4)   |  | C45-H45A    | 0.9900     |
| N42-C45 | 1.490(4)   |  | C45-H45B    | 0.9900     |
| N43-C50 | 1.343(4)   |  | C46-C47     | 1.371(5)   |
| N43-C46 | 1.352(4)   |  | C47-C48     | 1.393(5)   |
| N44-C66 | 1.338(5)   |  | C47-H47     | 0.9500     |
| N44-C70 | 1.350(4)   |  | C48-C49     | 1.373(6)   |
| C1-C41  | 1.524(5)   |  | C48-H48     | 0.9500     |
| C1-H1A  | 0.9900     |  | C49-C50     | 1.375(6)   |
| C1-H1B  | 0.9900     |  | C49-H49     | 0.9500     |
| C2-C3   | 1.515(5)   |  | C50-H50     | 0.9500     |
| C2-H2A  | 0.9900     |  | C65-C66     | 1.505(5)   |
| C2-H2B  | 0.9900     |  | C65-H65A    | 0.9900     |
| C3-H3A  | 0.9900     |  | C65-H65B    | 0.9900     |
| C3-H3B  | 0.9900     |  | C66-C67     | 1.390(5)   |
| C4-H4A  | 0.9800     |  | C67-C68     | 1.379(6)   |
| C4-H4B  | 0.9800     |  | C67-H67     | 0.9500     |
| C4-H4C  | 0.9800     |  | C68-C69     | 1.371(6)   |
| C5-C6   | 1.508(5)   |  | C68-H68     | 0.9500     |
| C5-H5A  | 0.9900     |  | C69-C70     | 1.373(5)   |
| C5-H5B  | 0.9900     |  | C69-H69     | 0.9500     |
| C6-C7   | 1.368(5)   |  | C70-H70     | 0.9500     |
| C7-C8   | 1.395(6)   |  | Cl3-O34     | 1.430(3)   |
| C7-H7   | 0.9500     |  | Cl3-O31     | 1.440(3)   |
| Cl3-O33 | 1.446(3)   |  | N41-Fe2-Fe1 | 87.67(7)   |
| Cl4-O41 | 1.428(3)   |  | Cl2-Fe2-Fe1 | 97.69(3)   |
| Cl3-O32 | 1.443(3)   |  | Fe1-O3-Fe2  | 173.51(15) |
| Cl4-O44 | 1.436(3)   |  | C4-N1-C1    | 108.9(3)   |

|             |            |  |               |            |
|-------------|------------|--|---------------|------------|
| Cl4-O43     | 1.439(3)   |  | C4-N1-C2      | 109.6(3)   |
| Cl4-O42     | 1.443(3)   |  | C1-N1-C2      | 107.8(3)   |
| O1S-C1S     | 1.194(11)  |  | C4-N1-Fe1     | 113.5(2)   |
| O1S-C2S     | 1.626(7)   |  | C1-N1-Fe1     | 112.3(2)   |
| C1S-C2S     | 0.775(10)  |  | C2-N1-Fe1     | 104.5(2)   |
| C1S-C1S#1   | 1.55(2)    |  | C5-N2-C25     | 110.1(3)   |
| C2S-C1S#1   | 0.775(10)  |  | C5-N2-C3      | 112.3(3)   |
| C2S-O1S#1   | 1.626(7)   |  | C25-N2-C3     | 111.0(3)   |
|             |            |  | C5-N2-Fe1     | 103.3(2)   |
| O3-Fe1-N3   | 91.16(11)  |  | C25-N2-Fe1    | 114.86(19) |
| O3-Fe1-N2   | 95.62(10)  |  | C3-N2-Fe1     | 105.1(2)   |
| N3-Fe1-N2   | 75.10(10)  |  | C10-N3-C6     | 118.8(3)   |
| O3-Fe1-N1   | 90.17(11)  |  | C10-N3-Fe1    | 126.8(2)   |
| N3-Fe1-N1   | 156.41(11) |  | C6-N3-Fe1     | 113.9(2)   |
| N2-Fe1-N1   | 81.33(11)  |  | C26-N4-C30    | 117.7(3)   |
| O3-Fe1-N4   | 170.87(11) |  | C26-N4-Fe1    | 117.1(2)   |
| N3-Fe1-N4   | 86.95(10)  |  | C30-N4-Fe1    | 125.1(2)   |
| N2-Fe1-N4   | 75.25(10)  |  | C41-N41-C44   | 108.8(3)   |
| N1-Fe1-N4   | 88.03(10)  |  | C41-N41-C42   | 108.1(3)   |
| O3-Fe1-Cl1  | 99.42(8)   |  | C44-N41-C42   | 108.7(3)   |
| N3-Fe1-Cl1  | 99.97(8)   |  | C41-N41-Fe2   | 111.9(2)   |
| N2-Fe1-Cl1  | 164.29(8)  |  | C44-N41-Fe2   | 113.2(2)   |
| N1-Fe1-Cl1  | 103.04(8)  |  | C42-N41-Fe2   | 105.9(2)   |
| N4-Fe1-Cl1  | 89.71(8)   |  | C65-N42-C43   | 111.6(3)   |
| O3-Fe1-Fe2  | 3.26(8)    |  | C65-N42-C45   | 110.1(2)   |
| N3-Fe1-Fe2  | 94.22(7)   |  | C43-N42-C45   | 112.3(3)   |
| N2-Fe1-Fe2  | 95.32(7)   |  | C65-N42-Fe2   | 113.0(2)   |
| N1-Fe1-Fe2  | 86.91(7)   |  | C43-N42-Fe2   | 105.3(2)   |
| N4-Fe1-Fe2  | 169.89(8)  |  | C45-N42-Fe2   | 104.37(19) |
| Cl1-Fe1-Fe2 | 99.96(3)   |  | C50-N43-C46   | 118.5(3)   |
| O3-Fe2-N43  | 90.44(11)  |  | C50-N43-Fe2   | 126.2(2)   |
| O3-Fe2-N44  | 172.00(11) |  | C46-N43-Fe2   | 114.7(2)   |
| N43-Fe2-N44 | 87.28(11)  |  | C66-N44-C70   | 118.6(3)   |
| O3-Fe2-N42  | 95.17(10)  |  | C66-N44-Fe2   | 116.4(2)   |
| N43-Fe2-N42 | 74.38(10)  |  | C70-N44-Fe2   | 124.9(2)   |
| N44-Fe2-N42 | 76.83(11)  |  | N1-C1-C41     | 113.5(3)   |
| O3-Fe2-N41  | 90.28(11)  |  | N1-C1-H1A     | 108.9      |
| N43-Fe2-N41 | 155.07(11) |  | C41-C1-H1A    | 108.9      |
| N44-Fe2-N41 | 88.57(11)  |  | N1-C1-H1B     | 108.9      |
| N42-Fe2-N41 | 80.74(11)  |  | C41-C1-H1B    | 108.9      |
| O3-Fe2-Cl2  | 98.75(8)   |  | H1A-C1-H1B    | 107.7      |
| N43-Fe2-Cl2 | 97.78(8)   |  | N1-C2-C3      | 110.3(3)   |
| N44-Fe2-Cl2 | 89.16(8)   |  | N1-C2-H2A     | 109.6      |
| N42-Fe2-Cl2 | 164.10(7)  |  | C3-C2-H2A     | 109.6      |
| N41-Fe2-Cl2 | 106.73(9)  |  | N1-C2-H2B     | 109.6      |
| O3-Fe2-Fe1  | 3.23(8)    |  | C3-C2-H2B     | 109.6      |
| N43-Fe2-Fe1 | 93.61(7)   |  | H2A-C2-H2B    | 108.1      |
| N44-Fe2-Fe1 | 172.90(8)  |  | N2-C3-C2      | 108.5(3)   |
| N42-Fe2-Fe1 | 96.61(7)   |  | N2-C3-H3A     | 110.0      |
| C2-C3-H3A   | 110.0      |  | N41-C41-H41A  | 109.0      |
| N2-C3-H3B   | 110.0      |  | C1-C41-H41A   | 109.0      |
| C2-C3-H3B   | 110.0      |  | N41-C41-H41B  | 109.0      |
| H3A-C3-H3B  | 108.4      |  | C1-C41-H41B   | 109.0      |
| N1-C4-H4A   | 109.5      |  | H41A-C41-H41B | 107.8      |
| N1-C4-H4B   | 109.5      |  | N41-C42-C43   | 109.6(3)   |
| H4A-C4-H4B  | 109.5      |  | N41-C42-H42A  | 109.7      |
| N1-C4-H4C   | 109.5      |  | C43-C42-H42A  | 109.7      |

|               |          |  |               |            |
|---------------|----------|--|---------------|------------|
| H4A-C4-H4C    | 109.5    |  | N41-C42-H42B  | 109.7      |
| H4B-C4-H4C    | 109.5    |  | C43-C42-H42B  | 109.7      |
| N2-C5-C6      | 108.7(3) |  | H42A-C42-H42B | 108.2      |
| N2-C5-H5A     | 109.9    |  | N42-C43-C42   | 109.3(3)   |
| C6-C5-H5A     | 109.9    |  | N42-C43-H43A  | 109.8      |
| N2-C5-H5B     | 109.9    |  | C42-C43-H43A  | 109.8      |
| C6-C5-H5B     | 109.9    |  | N42-C43-H43B  | 109.8      |
| H5A-C5-H5B    | 108.3    |  | C42-C43-H43B  | 109.8      |
| N3-C6-C7      | 122.2(3) |  | H43A-C43-H43B | 108.3      |
| N3-C6-C5      | 114.6(3) |  | N41-C44-H44A  | 109.5      |
| C7-C6-C5      | 123.1(3) |  | N41-C44-H44B  | 109.5      |
| C6-C7-C8      | 118.6(3) |  | H44A-C44-H44B | 109.5      |
| C6-C7-H7      | 120.7    |  | N41-C44-H44C  | 109.5      |
| C8-C7-H7      | 120.7    |  | H44A-C44-H44C | 109.5      |
| C9-C8-C7      | 119.4(4) |  | H44B-C44-H44C | 109.5      |
| C9-C8-H8      | 120.3    |  | N42-C45-C46   | 108.2(3)   |
| C7-C8-H8      | 120.3    |  | N42-C45-H45A  | 110.1      |
| C8-C9-C10     | 119.2(4) |  | C46-C45-H45A  | 110.1      |
| C8-C9-H9      | 120.4    |  | N42-C45-H45B  | 110.1      |
| C10-C9-H9     | 120.4    |  | C46-C45-H45B  | 110.1      |
| N3-C10-C9     | 121.7(3) |  | H45A-C45-H45B | 108.4      |
| N3-C10-H10    | 119.1    |  | N43-C46-C47   | 122.2(3)   |
| C9-C10-H10    | 119.1    |  | N43-C46-C45   | 115.2(3)   |
| N2-C25-C26    | 113.6(3) |  | C47-C46-C45   | 122.6(3)   |
| N2-C25-H25A   | 108.8    |  | C46-C47-C48   | 118.4(3)   |
| C26-C25-H25A  | 108.8    |  | C46-C47-H47   | 120.8      |
| N2-C25-H25B   | 108.8    |  | C48-C47-H47   | 120.8      |
| C26-C25-H25B  | 108.8    |  | C49-C48-C47   | 119.6(3)   |
| H25A-C25-H25B | 107.7    |  | C49-C48-H48   | 120.2      |
| N4-C26-C27    | 122.7(3) |  | C47-C48-H48   | 120.2      |
| N4-C26-C25    | 117.3(3) |  | C48-C49-C50   | 118.8(3)   |
| C27-C26-C25   | 119.9(3) |  | C48-C49-H49   | 120.6      |
| C28-C27-C26   | 119.0(3) |  | C50-C49-H49   | 120.6      |
| C28-C27-H27   | 120.5    |  | N43-C50-C49   | 122.4(3)   |
| C26-C27-H27   | 120.5    |  | N43-C50-H50   | 118.8      |
| C27-C28-C29   | 119.0(3) |  | C49-C50-H50   | 118.8      |
| C27-C28-H28   | 120.5    |  | N42-C65-C66   | 113.3(3)   |
| C29-C28-H28   | 120.5    |  | N42-C65-H65A  | 108.9      |
| C30-C29-C28   | 118.3(3) |  | C66-C65-H65A  | 108.9      |
| C30-C29-H29   | 120.8    |  | N42-C65-H65B  | 108.9      |
| C28-C29-H29   | 120.8    |  | C66-C65-H65B  | 108.9      |
| N4-C30-C29    | 123.3(3) |  | H65A-C65-H65B | 107.7      |
| N4-C30-H30    | 118.4    |  | N44-C66-C67   | 121.4(3)   |
| C29-C30-H30   | 118.4    |  | N44-C66-C65   | 118.7(3)   |
| N41-C41-C1    | 112.8(3) |  | C67-C66-C65   | 119.9(3)   |
| C68-C67-C66   | 119.1(4) |  | O32-C13-O33   | 109.12(16) |
| C68-C67-H67   | 120.4    |  | O41-C14-O44   | 109.44(19) |
| C66-C67-H67   | 120.4    |  | O41-C14-O43   | 109.5(2)   |
| C69-C68-C67   | 119.6(3) |  | O44-C14-O43   | 109.5(2)   |
| C69-C68-H68   | 120.2    |  | O41-C14-O42   | 110.7(2)   |
| C67-C68-H68   | 120.2    |  | O44-C14-O42   | 108.8(2)   |
| C68-C69-C70   | 118.6(3) |  | O43-C14-O42   | 108.9(2)   |
| C68-C69-H69   | 120.7    |  | C1S-O1S-C2S   | 26.7(5)    |
| C70-C69-H69   | 120.7    |  | C2S-C1S-O1S   | 109.5(11)  |
| N44-C70-C69   | 122.7(4) |  | C2S-C1S-C1S#1 | 0.0(6)     |
| N44-C70-H70   | 118.7    |  | O1S-C1S-C1S#1 | 109.5(11)  |
| C69-C70-H70   | 118.7    |  | C1S#1-C2S-C1S | 180.0(19)  |

|             |            |  |                 |            |
|-------------|------------|--|-----------------|------------|
| O34-Cl3-O31 | 109.41(18) |  | C1S#1-C2S-O1S#1 | 43.8(8)    |
| O34-Cl3-O32 | 110.05(17) |  | C1S-C2S-O1S#1   | 136.2(8)   |
| O31-Cl3-O32 | 109.65(17) |  | C1S#1-C2S-O1S   | 136.2(8)   |
| O34-Cl3-O33 | 109.05(18) |  | C1S-C2S-O1S     | 43.8(8)    |
| O31-Cl3-O33 | 109.54(18) |  | O1S#1-C2S-O1S   | 179.998(1) |

---

Symmetry transformations used to generate equivalent atoms:

#1 -x+1,-y,-z+1

**Table S5.** Bond lengths [Å] and angles [°] for [(hilde<sup>Me2</sup>){Fe( $\mu$ -O)Fe}]•CH<sub>2</sub>Cl<sub>2</sub>.

|             |           |  |               |            |
|-------------|-----------|--|---------------|------------|
| Fe1-O3      | 1.7858(7) |  | C27-C28       | 1.405(5)   |
| Fe1-N1      | 2.242(3)  |  | C28-C29       | 1.385(5)   |
| Fe1-N2      | 2.294(3)  |  | C28-C32       | 1.503(5)   |
| Fe1-O1      | 1.877(2)  |  | C29-C30       | 1.394(5)   |
| Fe1-O2      | 1.892(2)  |  | C29-H29A      | 0.9500     |
| Fe1-Fe1#1   | 3.5215(9) |  | C30-C31       | 1.385(5)   |
| O1-C7       | 1.338(4)  |  | C30-C36       | 1.514(5)   |
| O2-C27      | 1.349(4)  |  | C31-H31A      | 0.9500     |
| O3-Fe1#1    | 1.7858(7) |  | C32-H32A      | 0.9800     |
| N1-C2       | 1.484(4)  |  | C32-H32B      | 0.9800     |
| N1-C1       | 1.488(4)  |  | C32-H32C      | 0.9800     |
| N1-C4       | 1.490(4)  |  | C36-H36A      | 0.9800     |
| N2-C3       | 1.484(4)  |  | C36-H36B      | 0.9800     |
| N2-C5       | 1.496(4)  |  | C36-H36C      | 0.9800     |
| N2-C25      | 1.501(4)  |  | C100-Cl1      | 1.773(5)   |
| C1-C1#1     | 1.524(7)  |  | C100-Cl1#1    | 1.773(5)   |
| C1-H1A      | 0.9900    |  | C100-H10A     | 0.9602     |
| C1-H1B      | 0.9900    |  |               |            |
| C2-C3       | 1.520(4)  |  | O3-Fe1-O1     | 104.62(10) |
| C2-H2A      | 0.9900    |  | O3-Fe1-O2     | 95.25(8)   |
| C2-H2B      | 0.9900    |  | O1-Fe1-O2     | 119.76(11) |
| C3-H3A      | 0.9900    |  | O3-Fe1-N1     | 89.49(11)  |
| C3-H3B      | 0.9900    |  | O1-Fe1-N1     | 106.61(10) |
| C4-H4A      | 0.9800    |  | O2-Fe1-N1     | 130.18(11) |
| C4-H4B      | 0.9800    |  | O3-Fe1-N2     | 164.15(11) |
| C4-H4C      | 0.9800    |  | O1-Fe1-N2     | 88.28(9)   |
| C5-C6       | 1.504(5)  |  | O2-Fe1-N2     | 85.98(10)  |
| C5-H5A      | 0.9900    |  | N1-Fe1-N2     | 77.83(9)   |
| C5-H5B      | 0.9900    |  | O3-Fe1-Fe1#1  | 9.61(10)   |
| C6-C11      | 1.396(5)  |  | O1-Fe1-Fe1#1  | 111.49(7)  |
| C6-C7       | 1.409(4)  |  | O2-Fe1-Fe1#1  | 96.96(7)   |
| C7-C8       | 1.405(5)  |  | N1-Fe1-Fe1#1  | 81.14(7)   |
| C8-C9       | 1.387(5)  |  | N2-Fe1-Fe1#1  | 154.58(6)  |
| C8-C12      | 1.507(5)  |  | C7-O1-Fe1     | 132.0(2)   |
| C9-C10      | 1.393(5)  |  | C27-O2-Fe1    | 130.7(2)   |
| C9-H9A      | 0.9500    |  | Fe1#1-O3-Fe1  | 160.78(19) |
| C10-C11     | 1.375(5)  |  | C2-N1-C1      | 109.7(3)   |
| C10-C16     | 1.520(5)  |  | C2-N1-C4      | 110.5(3)   |
| C11-H11A    | 0.9500    |  | C1-N1-C4      | 107.6(2)   |
| C12-H12A    | 0.9800    |  | C2-N1-Fe1     | 109.88(18) |
| C12-H12B    | 0.9800    |  | C1-N1-Fe1     | 113.10(19) |
| C12-H12C    | 0.9800    |  | C4-N1-Fe1     | 105.87(19) |
| C16-H16A    | 0.9800    |  | C3-N2-C5      | 111.0(3)   |
| C16-H16B    | 0.9800    |  | C3-N2-C25     | 109.8(2)   |
| C16-H16C    | 0.9800    |  | C5-N2-C25     | 107.8(2)   |
| C25-C26     | 1.508(5)  |  | C3-N2-Fe1     | 109.23(18) |
| C25-H25A    | 0.9900    |  | C5-N2-Fe1     | 109.10(19) |
| C25-H25B    | 0.9900    |  | C25-N2-Fe1    | 109.85(19) |
| C26-C27     | 1.394(5)  |  | N1-C1-C1#1    | 112.4(3)   |
| C26-C31     | 1.401(4)  |  | N1-C1-H1A     | 109.1      |
| C1#1-C1-H1A | 109.1     |  | C8-C12-H12C   | 109.5      |
| N1-C1-H1B   | 109.1     |  | H12A-C12-H12C | 109.5      |
| C1#1-C1-H1B | 109.1     |  | H12B-C12-H12C | 109.5      |
| H1A-C1-H1B  | 107.9     |  | C10-C16-H16A  | 109.5      |

|               |          |  |                 |          |
|---------------|----------|--|-----------------|----------|
| N1-C2-C3      | 110.8(3) |  | C10-C16-H16B    | 109.5    |
| N1-C2-H2A     | 109.5    |  | H16A-C16-H16B   | 109.5    |
| C3-C2-H2A     | 109.5    |  | C10-C16-H16C    | 109.5    |
| N1-C2-H2B     | 109.5    |  | H16A-C16-H16C   | 109.5    |
| C3-C2-H2B     | 109.5    |  | H16B-C16-H16C   | 109.5    |
| H2A-C2-H2B    | 108.1    |  | N2-C25-C26      | 112.1(3) |
| N2-C3-C2      | 109.9(3) |  | N2-C25-H25A     | 109.2    |
| N2-C3-H3A     | 109.7    |  | C26-C25-H25A    | 109.2    |
| C2-C3-H3A     | 109.7    |  | N2-C25-H25B     | 109.2    |
| N2-C3-H3B     | 109.7    |  | C26-C25-H25B    | 109.2    |
| C2-C3-H3B     | 109.7    |  | H25A-C25-H25B   | 107.9    |
| H3A-C3-H3B    | 108.2    |  | C27-C26-C31     | 119.6(3) |
| N1-C4-H4A     | 109.5    |  | C27-C26-C25     | 118.9(3) |
| N1-C4-H4B     | 109.5    |  | C31-C26-C25     | 121.5(3) |
| H4A-C4-H4B    | 109.5    |  | O2-C27-C26      | 120.1(3) |
| N1-C4-H4C     | 109.5    |  | O2-C27-C28      | 119.9(3) |
| H4A-C4-H4C    | 109.5    |  | C26-C27-C28     | 120.0(3) |
| H4B-C4-H4C    | 109.5    |  | C29-C28-C27     | 118.5(3) |
| N2-C5-C6      | 114.2(3) |  | C29-C28-C32     | 121.8(3) |
| N2-C5-H5A     | 108.7    |  | C27-C28-C32     | 119.7(3) |
| C6-C5-H5A     | 108.7    |  | C28-C29-C30     | 122.9(3) |
| N2-C5-H5B     | 108.7    |  | C28-C29-H29A    | 118.6    |
| C6-C5-H5B     | 108.7    |  | C30-C29-H29A    | 118.6    |
| H5A-C5-H5B    | 107.6    |  | C31-C30-C29     | 117.6(3) |
| C11-C6-C7     | 119.2(3) |  | C31-C30-C36     | 122.0(3) |
| C11-C6-C5     | 120.4(3) |  | C29-C30-C36     | 120.4(3) |
| C7-C6-C5      | 120.2(3) |  | C30-C31-C26     | 121.5(3) |
| O1-C7-C8      | 119.1(3) |  | C30-C31-H31A    | 119.3    |
| O1-C7-C6      | 121.5(3) |  | C26-C31-H31A    | 119.3    |
| C8-C7-C6      | 119.4(3) |  | C28-C32-H32A    | 109.5    |
| C9-C8-C7      | 118.6(3) |  | C28-C32-H32B    | 109.5    |
| C9-C8-C12     | 122.5(3) |  | H32A-C32-H32B   | 109.5    |
| C7-C8-C12     | 118.9(3) |  | C28-C32-H32C    | 109.5    |
| C8-C9-C10     | 122.9(3) |  | H32A-C32-H32C   | 109.5    |
| C8-C9-H9A     | 118.5    |  | H32B-C32-H32C   | 109.5    |
| C10-C9-H9A    | 118.5    |  | C30-C36-H36A    | 109.5    |
| C11-C10-C9    | 117.4(3) |  | C30-C36-H36B    | 109.5    |
| C11-C10-C16   | 121.3(4) |  | H36A-C36-H36B   | 109.5    |
| C9-C10-C16    | 121.2(4) |  | C30-C36-H36C    | 109.5    |
| C10-C11-C6    | 122.2(3) |  | H36A-C36-H36C   | 109.5    |
| C10-C11-H11A  | 118.9    |  | H36B-C36-H36C   | 109.5    |
| C6-C11-H11A   | 118.9    |  | Cl1-C100-Cl1#1  | 109.2(4) |
| C8-C12-H12A   | 109.5    |  | Cl1-C100-H10A   | 110.0    |
| C8-C12-H12B   | 109.5    |  | Cl1#1-C100-H10A | 109.5    |
| H12A-C12-H12B | 109.5    |  |                 |          |

Symmetry transformations used to generate equivalent atoms:

#1 -x+1,y,-z+1/2

**Table S6.** Bond lengths [Å] and angles [°] for [(hilde<sup>Me2</sup>){FeCl}<sub>2</sub>]<sub>2</sub>•2CH<sub>2</sub>Cl<sub>2</sub>.

|             |            |  |               |            |
|-------------|------------|--|---------------|------------|
| Fe1-O2      | 1.833(2)   |  | C27-C28       | 1.392(4)   |
| Fe1-O1      | 1.862(2)   |  | C28-C29       | 1.396(4)   |
| Fe1-N2      | 2.220(3)   |  | C28-C32       | 1.504(5)   |
| Fe1-N1      | 2.223(2)   |  | C29-C30       | 1.391(5)   |
| Fe1-Cl1     | 2.3202(10) |  | C29-H29A      | 0.9500     |
| Fe1-Fe1#1   | 6.3799(8)  |  | C30-C31       | 1.388(5)   |
| O1-C7       | 1.352(3)   |  | C30-C36       | 1.518(4)   |
| O2-C27      | 1.358(3)   |  | C31-H31A      | 0.9500     |
| N2-C3       | 1.485(4)   |  | C32-H32A      | 0.9800     |
| N2-C25      | 1.497(4)   |  | C32-H32B      | 0.9800     |
| N2-C5       | 1.497(4)   |  | C32-H32C      | 0.9800     |
| N1-C2       | 1.490(4)   |  | C36-H36A      | 0.9800     |
| N1-C1       | 1.494(3)   |  | C36-H36B      | 0.9800     |
| N1-C4       | 1.498(4)   |  | C36-H36C      | 0.9800     |
| C1-C1#1     | 1.527(6)   |  | C101-Cl12     | 1.764(4)   |
| C1-H1A      | 0.9900     |  | C101-Cl11     | 1.769(4)   |
| C1-H1B      | 0.9900     |  | C101-H10A     | 0.9900     |
| C2-C3       | 1.526(4)   |  | C101-H10B     | 0.9900     |
| C2-H2A      | 0.9900     |  |               |            |
| C2-H2B      | 0.9900     |  | O2-Fe1-O1     | 120.18(10) |
| C3-H3A      | 0.9900     |  | O2-Fe1-N2     | 88.58(9)   |
| C3-H3B      | 0.9900     |  | O1-Fe1-N2     | 88.63(9)   |
| C4-H4A      | 0.9800     |  | O2-Fe1-N1     | 111.08(9)  |
| C4-H4B      | 0.9800     |  | O1-Fe1-N1     | 126.65(10) |
| C4-H4C      | 0.9800     |  | N2-Fe1-N1     | 78.46(9)   |
| C5-C6       | 1.502(4)   |  | O2-Fe1-Cl1    | 98.22(7)   |
| C5-H5A      | 0.9900     |  | O1-Fe1-Cl1    | 97.11(7)   |
| C5-H5B      | 0.9900     |  | N2-Fe1-Cl1    | 167.27(7)  |
| C6-C11      | 1.383(4)   |  | N1-Fe1-Cl1    | 89.03(7)   |
| C6-C7       | 1.399(4)   |  | O2-Fe1-Fe1#1  | 143.46(7)  |
| C7-C8       | 1.405(4)   |  | O1-Fe1-Fe1#1  | 96.22(7)   |
| C8-C9       | 1.390(4)   |  | N2-Fe1-Fe1#1  | 95.87(6)   |
| C8-C12      | 1.503(4)   |  | N1-Fe1-Fe1#1  | 36.11(6)   |
| C9-C10      | 1.397(5)   |  | Cl1-Fe1-Fe1#1 | 72.28(2)   |
| C9-H9A      | 0.9500     |  | C7-O1-Fe1     | 130.45(17) |
| C10-C11     | 1.388(4)   |  | C27-O2-Fe1    | 135.3(2)   |
| C10-C16     | 1.515(5)   |  | C3-N2-C25     | 109.7(2)   |
| C11-H11A    | 0.9500     |  | C3-N2-C5      | 109.3(2)   |
| C12-H12A    | 0.9800     |  | C25-N2-C5     | 109.2(2)   |
| C12-H12B    | 0.9800     |  | C3-N2-Fe1     | 109.38(18) |
| C12-H12C    | 0.9800     |  | C25-N2-Fe1    | 111.31(19) |
| C16-H16A    | 0.9800     |  | C5-N2-Fe1     | 107.94(17) |
| C16-H16B    | 0.9800     |  | C2-N1-C1      | 110.1(2)   |
| C16-H16C    | 0.9800     |  | C2-N1-C4      | 108.9(2)   |
| C25-C26     | 1.503(4)   |  | C1-N1-C4      | 107.7(2)   |
| C25-H25A    | 0.9900     |  | C2-N1-Fe1     | 111.20(18) |
| C25-H25B    | 0.9900     |  | C1-N1-Fe1     | 115.32(17) |
| C26-C31     | 1.396(4)   |  | C4-N1-Fe1     | 103.21(18) |
| C26-C27     | 1.404(5)   |  | N1-C1-C1#1    | 111.8(3)   |
| N1-C1-H1A   | 109.3      |  | H12A-C12-H12C | 109.5      |
| C1#1-C1-H1A | 109.3      |  | H12B-C12-H12C | 109.5      |
| N1-C1-H1B   | 109.3      |  | C10-C16-H16A  | 109.5      |

|               |          |  |                |          |
|---------------|----------|--|----------------|----------|
| C1#1-C1-H1B   | 109.3    |  | C10-C16-H16B   | 109.5    |
| H1A-C1-H1B    | 107.9    |  | H16A-C16-H16B  | 109.5    |
| N1-C2-C3      | 109.9(2) |  | C10-C16-H16C   | 109.5    |
| N1-C2-H2A     | 109.7    |  | H16A-C16-H16C  | 109.5    |
| C3-C2-H2A     | 109.7    |  | H16B-C16-H16C  | 109.5    |
| N1-C2-H2B     | 109.7    |  | N2-C25-C26     | 114.0(2) |
| C3-C2-H2B     | 109.7    |  | N2-C25-H25A    | 108.8    |
| H2A-C2-H2B    | 108.2    |  | C26-C25-H25A   | 108.8    |
| N2-C3-C2      | 109.5(2) |  | N2-C25-H25B    | 108.8    |
| N2-C3-H3A     | 109.8    |  | C26-C25-H25B   | 108.8    |
| C2-C3-H3A     | 109.8    |  | H25A-C25-H25B  | 107.7    |
| N2-C3-H3B     | 109.8    |  | C31-C26-C27    | 118.9(3) |
| C2-C3-H3B     | 109.8    |  | C31-C26-C25    | 119.9(3) |
| H3A-C3-H3B    | 108.2    |  | C27-C26-C25    | 121.1(3) |
| N1-C4-H4A     | 109.5    |  | O2-C27-C28     | 119.1(3) |
| N1-C4-H4B     | 109.5    |  | O2-C27-C26     | 120.3(3) |
| H4A-C4-H4B    | 109.5    |  | C28-C27-C26    | 120.7(3) |
| N1-C4-H4C     | 109.5    |  | C27-C28-C29    | 118.6(3) |
| H4A-C4-H4C    | 109.5    |  | C27-C28-C32    | 120.3(3) |
| H4B-C4-H4C    | 109.5    |  | C29-C28-C32    | 121.2(3) |
| N2-C5-C6      | 112.4(2) |  | C30-C29-C28    | 122.1(3) |
| N2-C5-H5A     | 109.1    |  | C30-C29-H29A   | 118.9    |
| C6-C5-H5A     | 109.1    |  | C28-C29-H29A   | 118.9    |
| N2-C5-H5B     | 109.1    |  | C31-C30-C29    | 118.2(3) |
| C6-C5-H5B     | 109.1    |  | C31-C30-C36    | 120.8(3) |
| H5A-C5-H5B    | 107.9    |  | C29-C30-C36    | 120.9(3) |
| C11-C6-C7     | 119.8(3) |  | C30-C31-C26    | 121.5(3) |
| C11-C6-C5     | 121.4(3) |  | C30-C31-H31A   | 119.3    |
| C7-C6-C5      | 118.8(3) |  | C26-C31-H31A   | 119.3    |
| O1-C7-C6      | 119.5(3) |  | C28-C32-H32A   | 109.5    |
| O1-C7-C8      | 120.4(3) |  | C28-C32-H32B   | 109.5    |
| C6-C7-C8      | 120.1(3) |  | H32A-C32-H32B  | 109.5    |
| C9-C8-C7      | 118.1(3) |  | C28-C32-H32C   | 109.5    |
| C9-C8-C12     | 121.6(3) |  | H32A-C32-H32C  | 109.5    |
| C7-C8-C12     | 120.3(3) |  | H32B-C32-H32C  | 109.5    |
| C8-C9-C10     | 122.8(3) |  | C30-C36-H36A   | 109.5    |
| C8-C9-H9A     | 118.6    |  | C30-C36-H36B   | 109.5    |
| C10-C9-H9A    | 118.6    |  | H36A-C36-H36B  | 109.5    |
| C11-C10-C9    | 117.4(3) |  | C30-C36-H36C   | 109.5    |
| C11-C10-C16   | 121.5(3) |  | H36A-C36-H36C  | 109.5    |
| C9-C10-C16    | 121.1(3) |  | H36B-C36-H36C  | 109.5    |
| C6-C11-C10    | 121.8(3) |  | CI12-C101-CI11 | 111.1(2) |
| C6-C11-H11A   | 119.1    |  | CI12-C101-H10A | 109.4    |
| C10-C11-H11A  | 119.1    |  | CI11-C101-H10A | 109.4    |
| C8-C12-H12A   | 109.5    |  | CI12-C101-H10B | 109.4    |
| C8-C12-H12B   | 109.5    |  | CI11-C101-H10B | 109.4    |
| H12A-C12-H12B | 109.5    |  | H10A-C101-H10B | 108.0    |
| C8-C12-H12C   | 109.5    |  |                |          |

Symmetry transformations used to generate equivalent atoms:



**Table S7.** Parameters obtained from fitting of the experimental magnetic data

|                                                                                                                  | $J$<br>/ $\text{cm}^{-1}$ | $g_1=g_2$ | $\Theta_W$<br>/ K | $TIP / 10^6$<br>$\text{cm}^3\text{mol}^{-1}$ | $p.i.$<br>/ % | $\Theta_W (p.i.)$<br>/ K |
|------------------------------------------------------------------------------------------------------------------|---------------------------|-----------|-------------------|----------------------------------------------|---------------|--------------------------|
| $[(julia)\{\text{Fe}(\text{H}_2\text{O})(\mu\text{-O})\text{Fe}(\text{H}_2\text{O})\}]\cdot 6\text{H}_2\text{O}$ | -108                      | 2.03      |                   | 100                                          | 0.9           | -5                       |
| $[(julia)\{\text{Fe}(\text{dmsO})(\mu\text{-O})\text{Fe}(\text{dmsO})\}]$                                        | -102                      | 2.00      |                   |                                              | 0.1           | -29                      |
| $[(susan)\{\text{FeCl}(\mu\text{-O})\text{FeCl}\}]\text{Cl}_2$                                                   | -106                      | 2.05      |                   |                                              | 0.3           | -3                       |
| $[(susan)\{\text{FeCl}(\mu\text{-O})\text{FeCl}_{0.75}(\text{OMe})_{0.25}\}](\text{ClO}_4)_2$                    | -105                      | 2.07      |                   |                                              | 0.3           | -15                      |
| $[(susan)\{\text{FeCl}(\mu\text{-O})\text{FeCl}\}](\text{ClO}_4)_2$                                              | -108                      | 2.05      |                   |                                              | 0.4           | -18                      |
| $[(hilde^{\text{Me}2})\{\text{Fe}(\mu\text{-O})\text{Fe}\}]$                                                     | -93.5                     | 2.09      |                   |                                              | 3.6           | -14                      |
| $[(hilde^{\text{Me}2})\{\text{FeCl}\}_2]$                                                                        |                           | 1.95      | -4.3              |                                              |               |                          |
